# Supplementary material
Source: PubMed Central journal article supplement (PMC4371828)
Supplement: supp_tpc.114.123752_tpc123752_Supplemental.pdf [file supp_tpc.114.123752_tpc123752_Supplemental.pdf]

*G. gynandra*      *T. hassleriana*

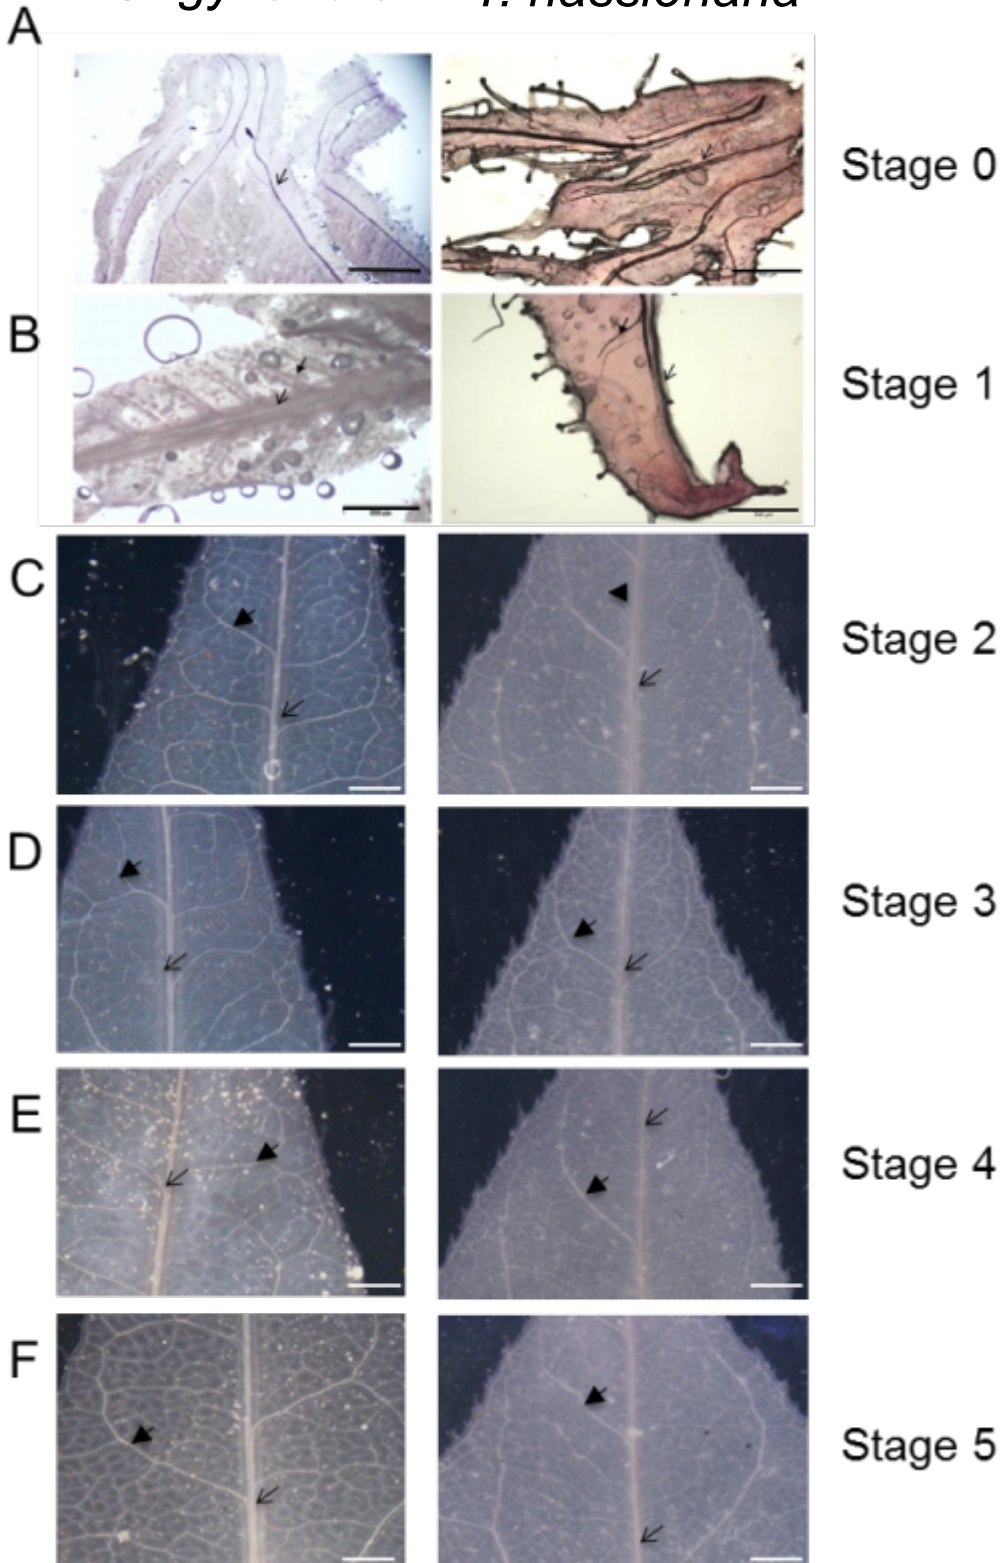

**Supplemental Figure 1. Venation patterning during leaf development of *G. gynandra* and *T. hassleriana*.**

**(A-B)** Cleared safranin stained leaves of stage 0 and 1 (n=3; scale bar 0.5 mm)

**(C-F)** Cleared leaves of stage 2, 3, 4 and 5 respectively (n=3; scale bar 1 mm)

Open arrows indicate the midvein (1°) and closed arrows the secondary vein (2°) localization

A

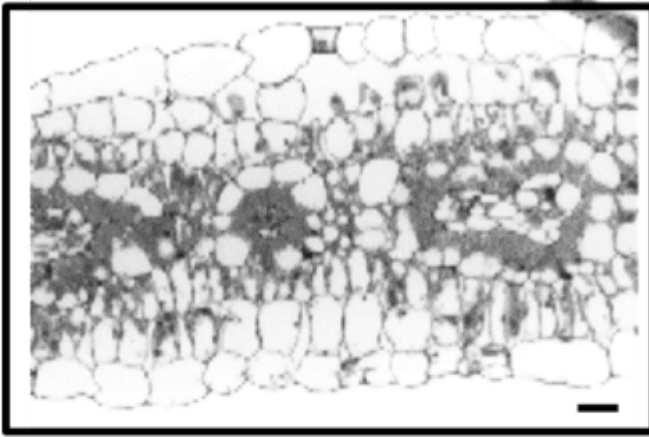

B

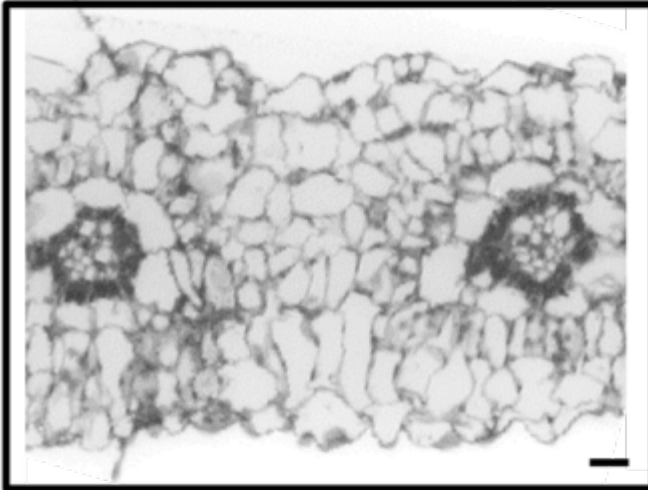

C

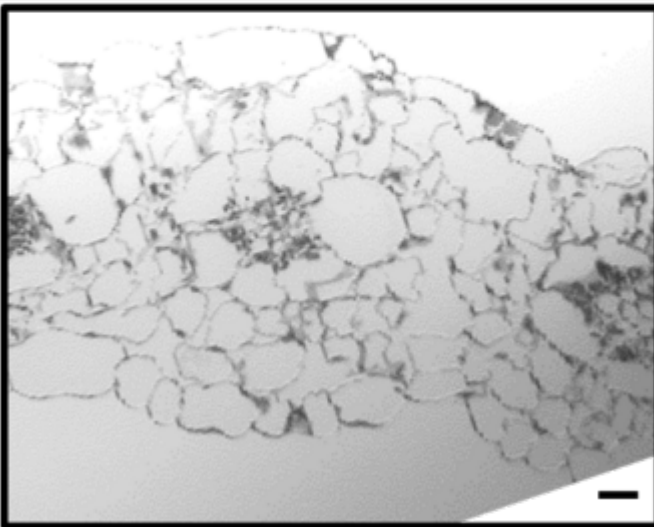

**Supplemental Figure 2. *G. gynandra* cotyledon anatomy two, four and six days after germination (DAG).** Semi-thin cross sections (3  $\mu\text{m}$ ) of *G. gynandra* cotyledons after two (A); four (B); six (C) DAG. Cross sections were stained with Toluidine Blue. (Scale bar 10  $\mu\text{m}$ , n=3)

A

*G. gynandra**T. hassleriana*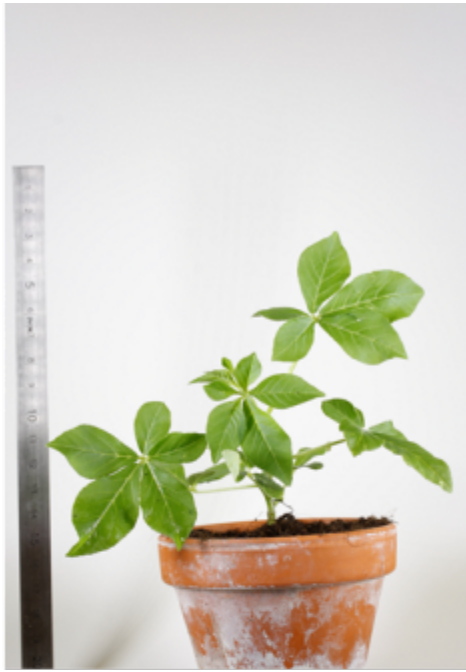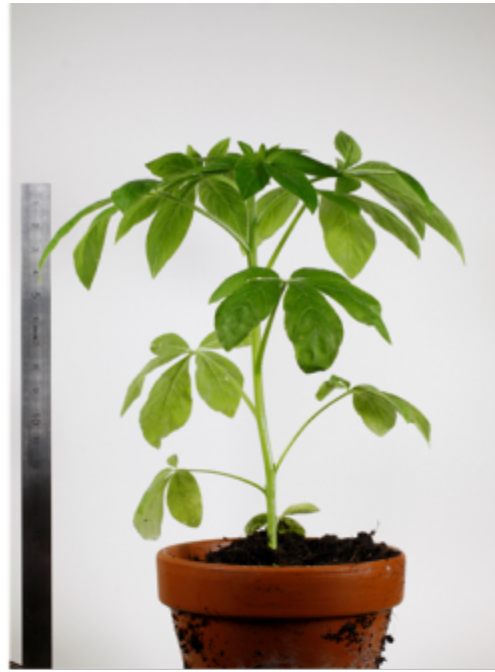

B

*G. gynandra**T. hassleriana*

1

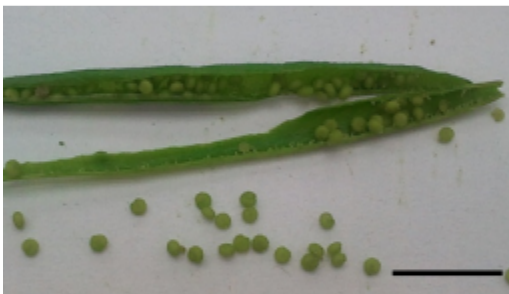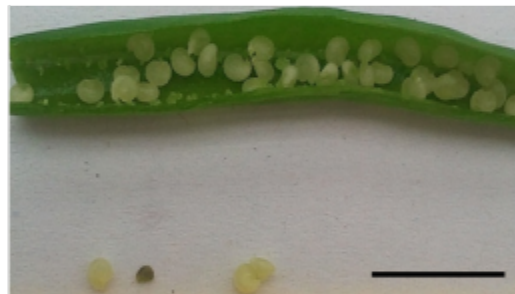

2

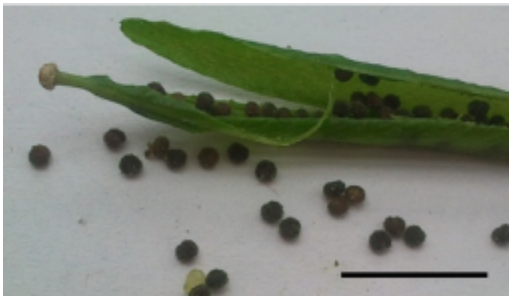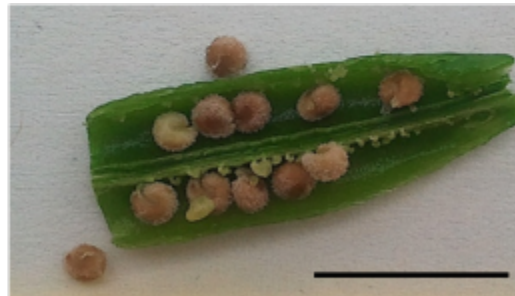

3

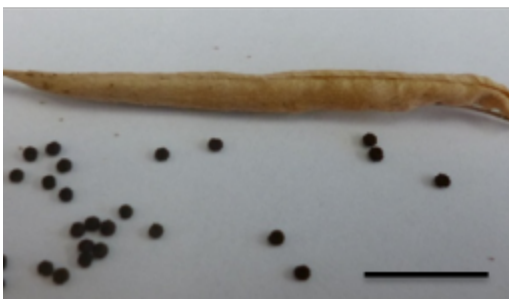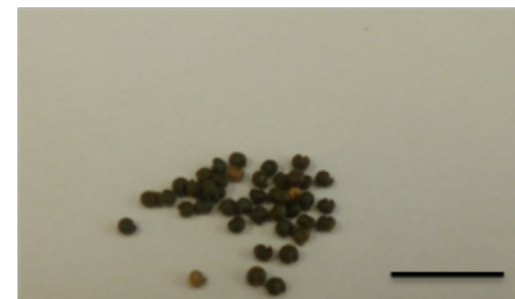

**Supplemental Figure 3. Images of tissues harvested for RNA-seq in *G. gynandra* and *T. hassleriana*. (A) Photographic image of *G. gynandra* and *T. hassleriana* 8-week old plants, from which leaf gradient, stem and root system were harvested (B) Seed coat development from harvested developmental seed gradient. (1) young seed (2) semi-mature seed (3) mature seed. (Scale bar = 1cm)**

A

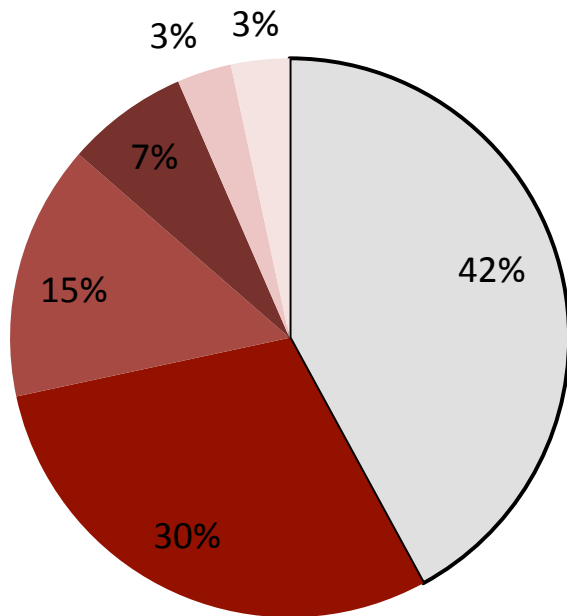

Number of best matching contigs per predicted cds within *T. hassleriana*

□ 1 ■ 2 ■ 3 ■ 4 ■ 5 ■ >5

B

Fragmented contig aligned to *T. hassleriana* cds

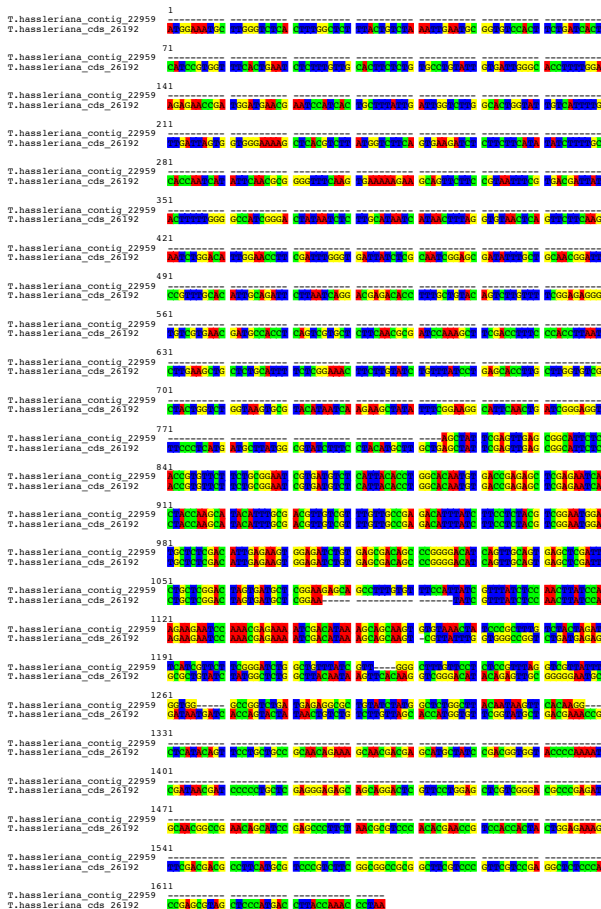

C

Fused/Hybrid contig aligned to *T. hassleriana* cds

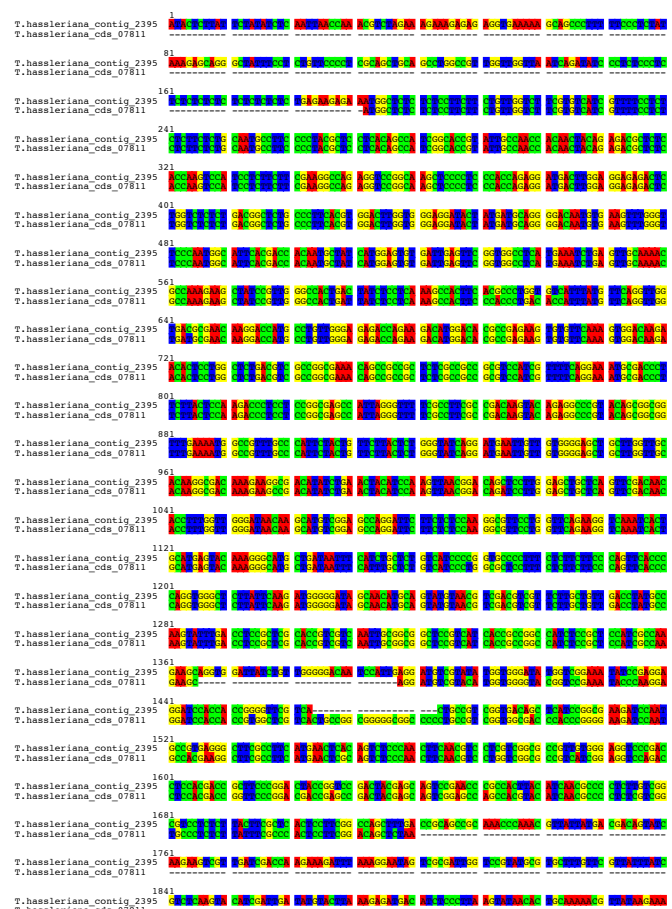

**Supplemental Figure 4. Quality assessment of Velvet/OASES assembled *T. hassleriana* contigs against predicted corresponding cds from *T. hassleriana* genome.**

**(A)** Percentage of contig number per predicted cds (Cheng et al., 2013) showing redundancy in assembled contigs.

**(B)** ClustalW alignment of fragmented contig (top) with corresponding cds (below).

**(C)** ClustalW alignment of fused contig (top) with corresponding cds (below).



A

## Quality of cross species mapping

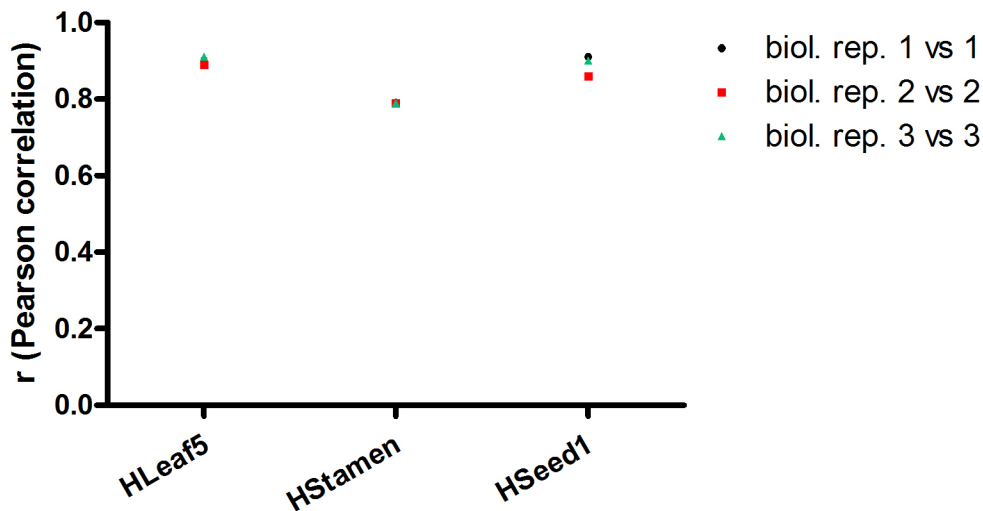

B

Quality of biological replicates cross species mapping in *T. hassleriana*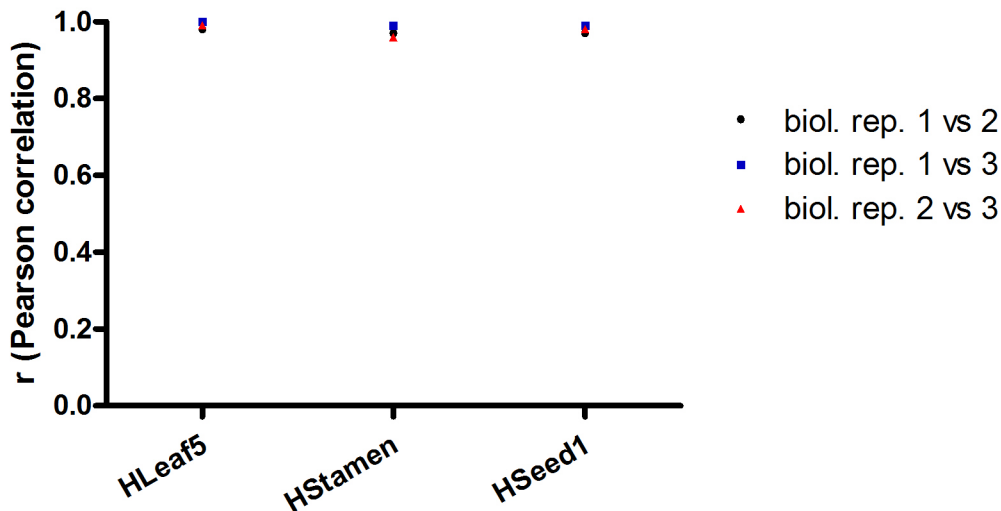

**Supplemental Figure 5. Quality assessment of the biological replicates of *T. hassleriana* libraries mapped to *A. thaliana* and mapping similarity of *T. hassleriana* libraries mapped to *A. thaliana* and to its own cds.**

**(A)** Pair-wise Pearson's correlation ( $r$ ) was calculated for all three pairs of biological replicates for each tissue in *T. hassleriana* mapped to *A. thaliana*. **(B)** Pair-wise Pearson's correlation ( $r$ ) between leaf 5, stamen and seed 1 in ( $n=3$ ) of *T. hassleriana* mapped to its own coding sequence and *A. thaliana*.

**PSI/PSII expression levels in roots**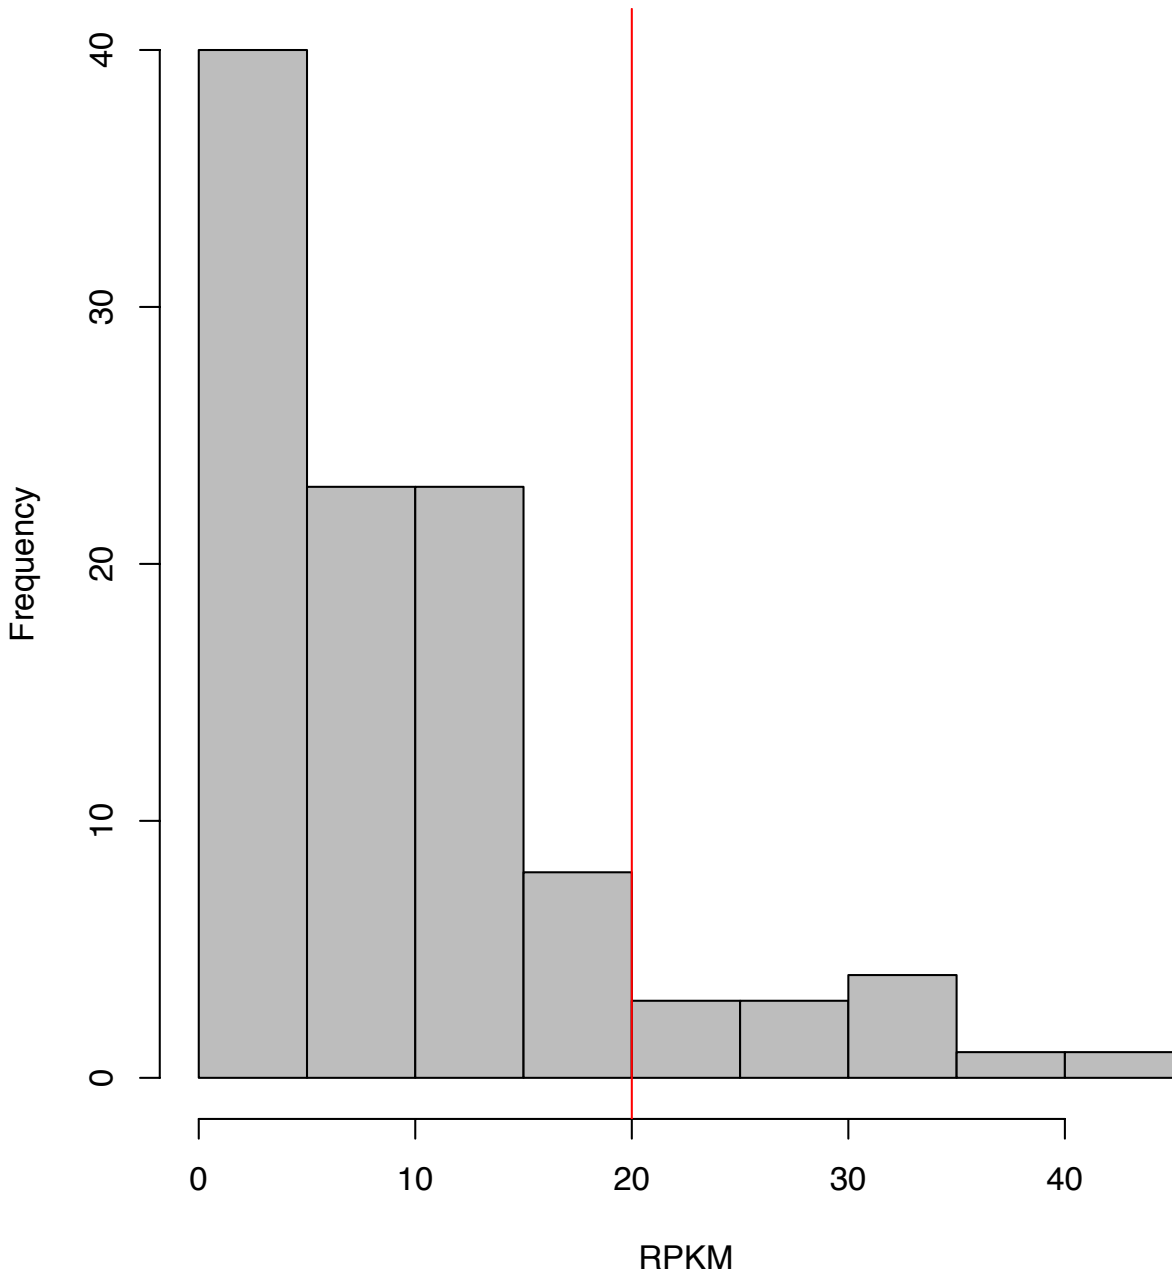

**Supplemental Figure 6. Determination of base line gene expression via a histogram of photosystem (PS) I and II transcript abundances reads per mappable million (RPKM) in the *G. gynandra* root.**

Y- axis shows frequency and X- axis depicts RPKM level of PSI and PSII transcript abundance. Red line indicates where threshold of base line expression was set.

**A** Quality of biological replicates in *G. gynandra*

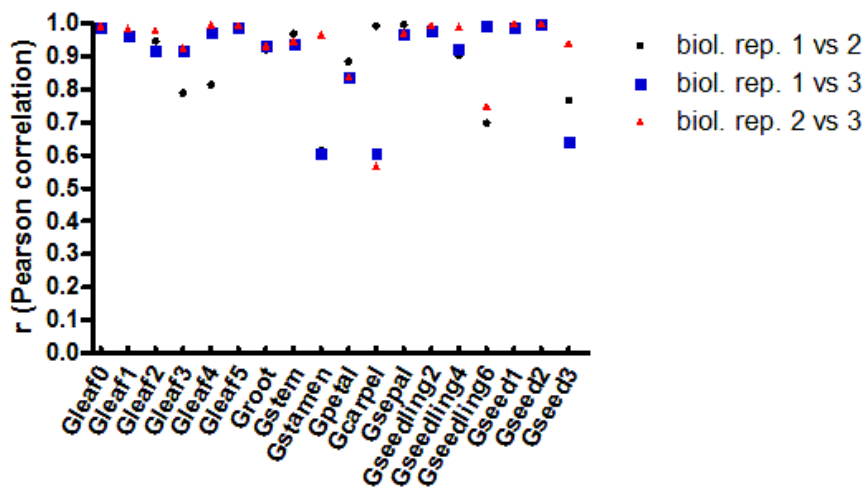

**B** Quality of biological replicates in *T. hassleriana*

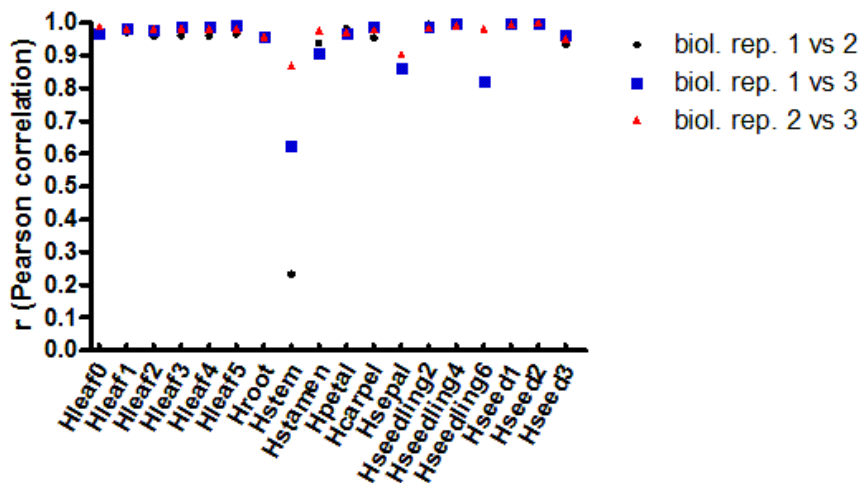

**C** Correlation of tissue-specific expression

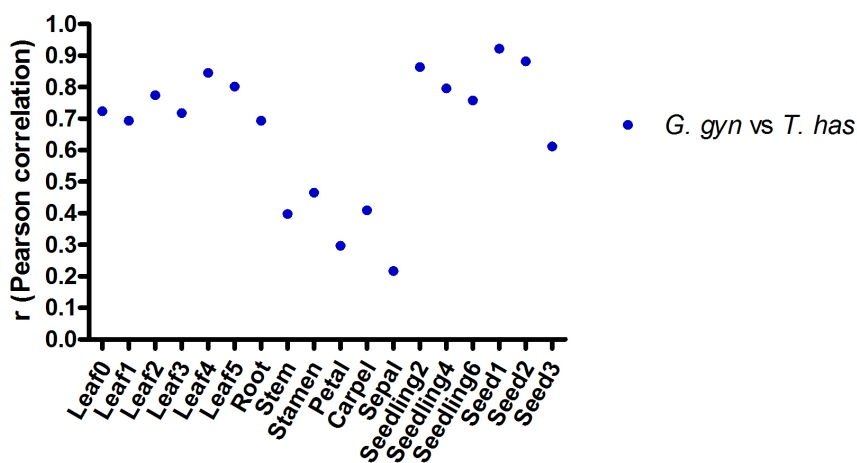

**Supplemental Figure 7. Quality assessment of the biological replicates within each species and tissue similarity between *G. gynandra* and *T. hassleriana*.** (A) Pair-wise Pearson's correlation ( $r$ ) was calculated for all three pairs of biological replicates for each tissue ( $n=3$ ) in *G. gynandra*. (B) Pair-wise Pearson's correlation ( $r$ ) was calculated for all three pairs of biological replicates for each tissue ( $n=3$ ) in *T. hassleriana*. (C) Pair-wise Pearson's correlation between individual tissues of *T. hassleriana* and *G. gynandra*.

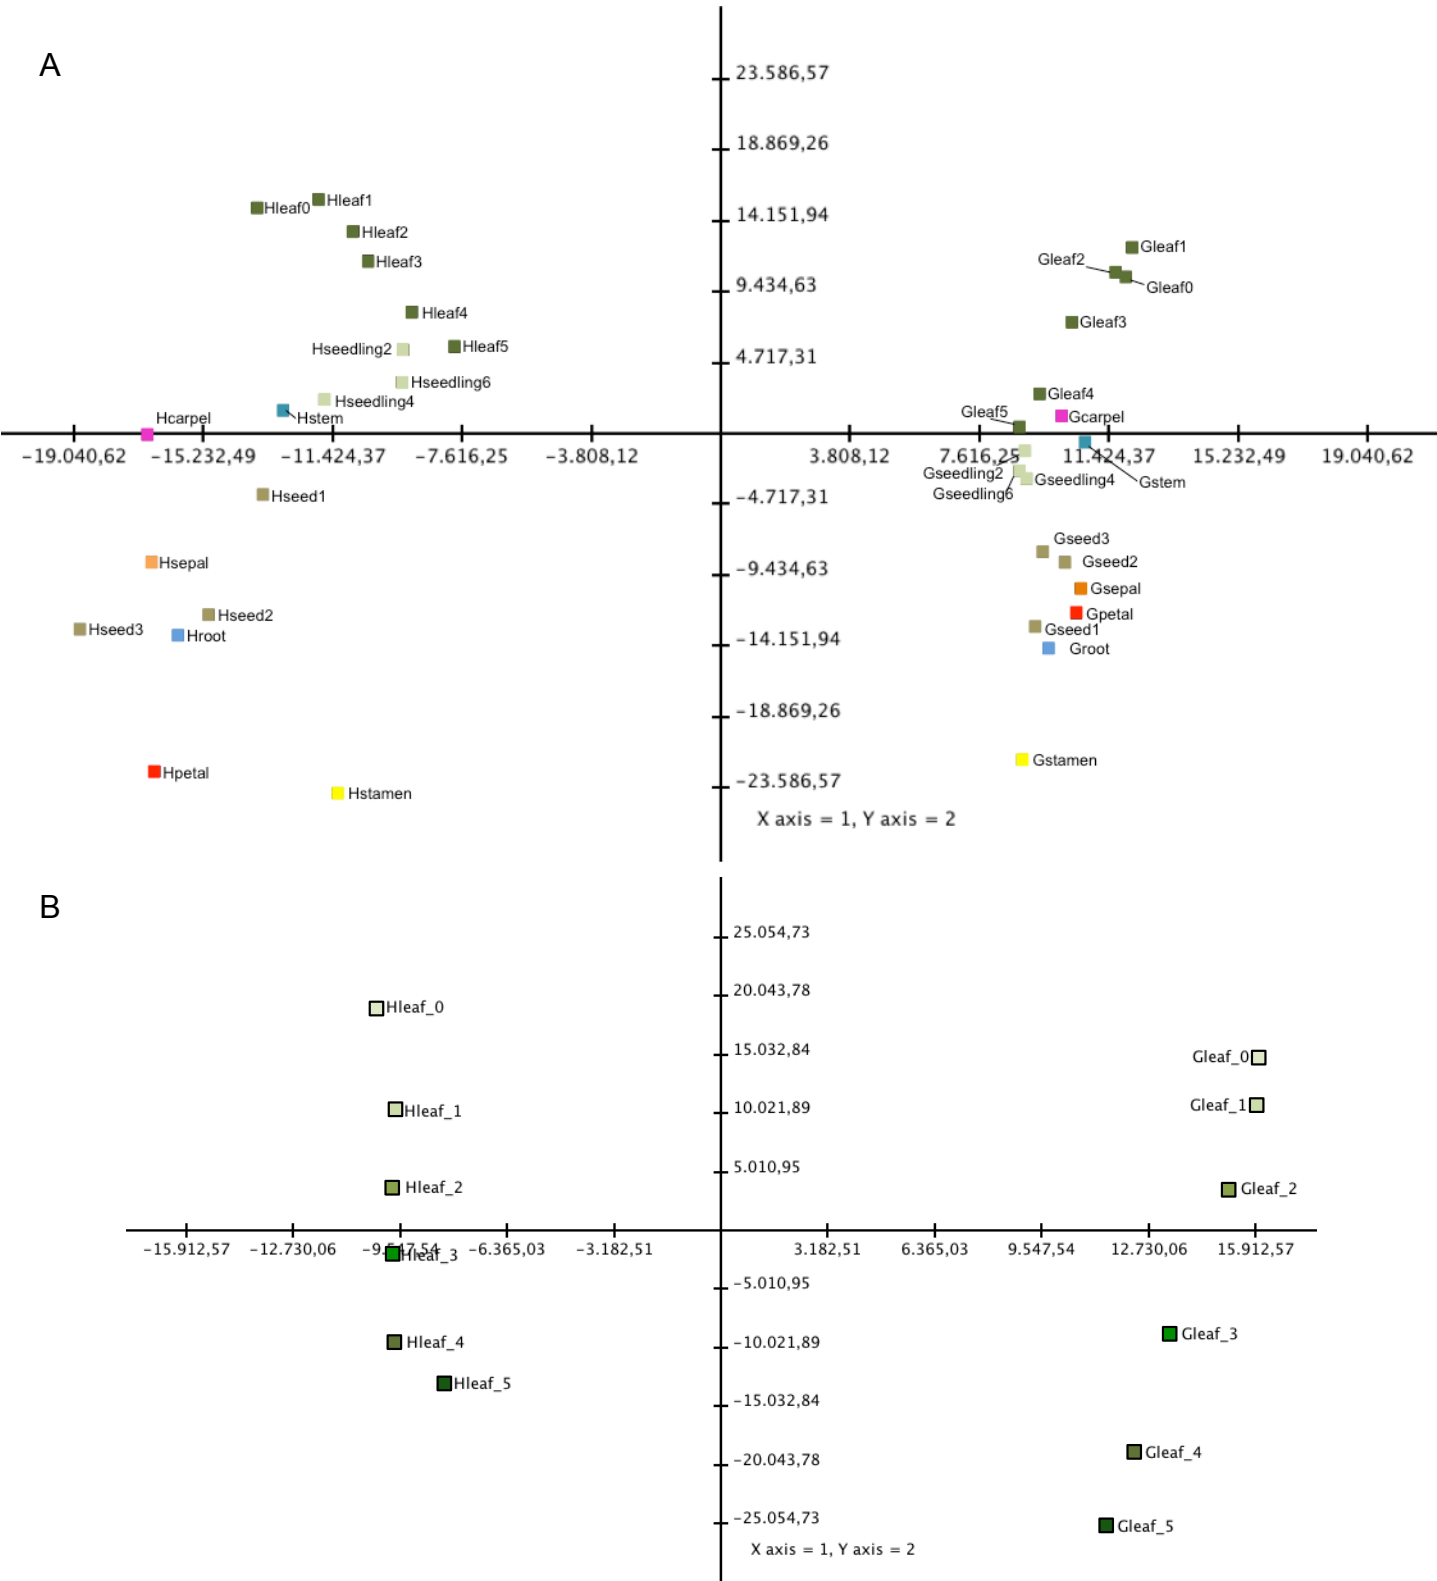

**Supplemental Figure 8. Principle component analysis between *G. gynandra* and *T. hassleriana*.**

**(A)** Plot shows all averaged tissues from *G. gynandra* (G) and *T. hassleriana* (H) sequenced (n=3). The first component describes 15% of all data variability separating both species. The second component (14%) separates samples by tissue identity within each species. Tissues are indicated by color key (left).

**(B)** Averaged leaf gradient samples (n=3) from *G. gynandra* (G) and *T. hassleriana* (H) were analysed. First component describes 44% and second component describes 29% of variability.



A

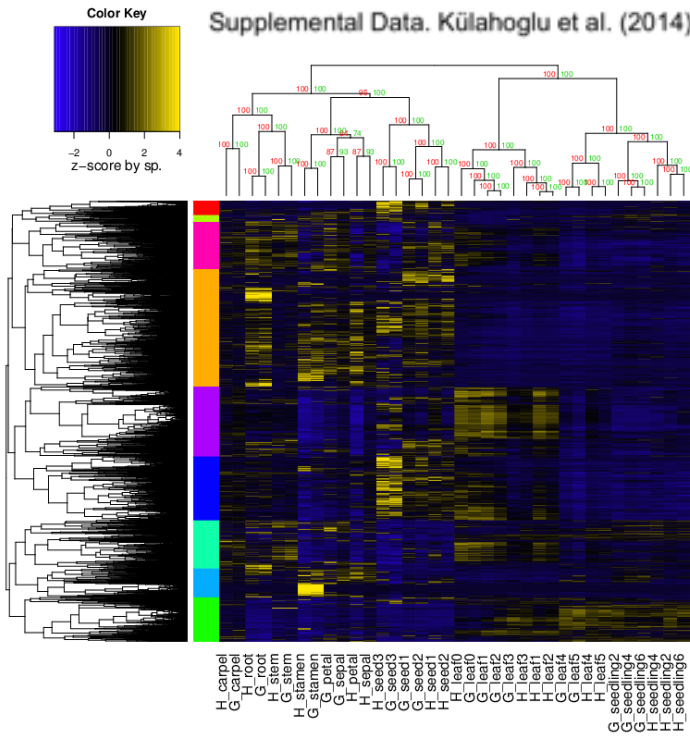

B

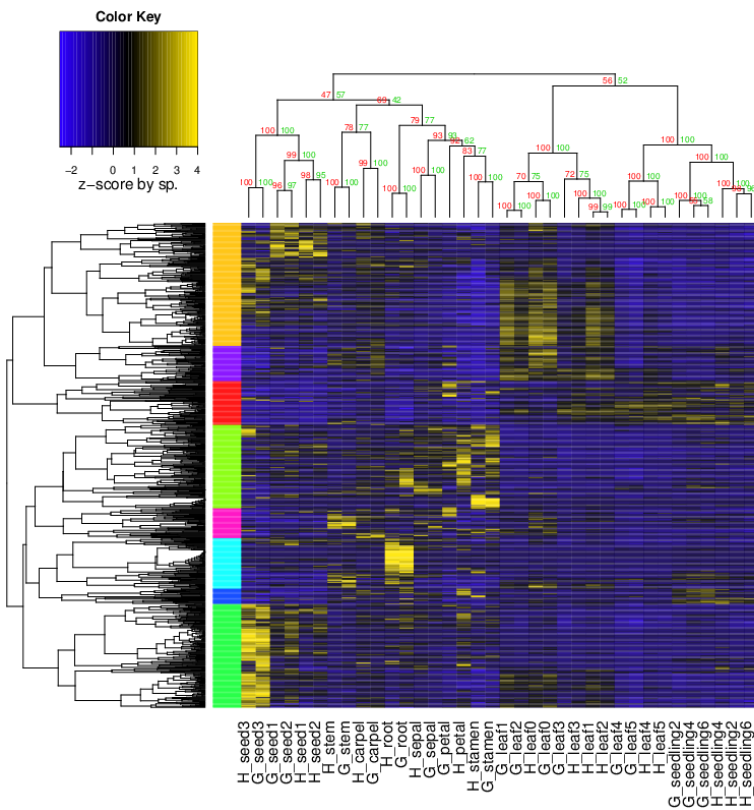

**Supplemental Figure 9. Hierarchical cluster analysis with bootstrapped samples of *G. gynandra* and *T. hassleriana*.** Numbers above the nodes show the approximately unbiased p-value (red) and the bootstrap probability (green). Blue is lowest expression and yellow highest expression. Left-hand vertical bars denote major clusters in the dendrogram by color. **(A)** Clustering of all over 20 RPKM expressed genes in all averaged samples ( $n=3$ ). Sample averages were clustered as species scaled Z-scores with Pearson's Correlation. **(B)** Hierarchical Clustering of all transcriptional regulators expressed in all tissues sequenced in *G. gynandra* and *T. hassleriana*. Sample averages ( $n=3$ ) were clustered as species-scaled Z-scores with Pearson's Correlation.

*T. hassleriana*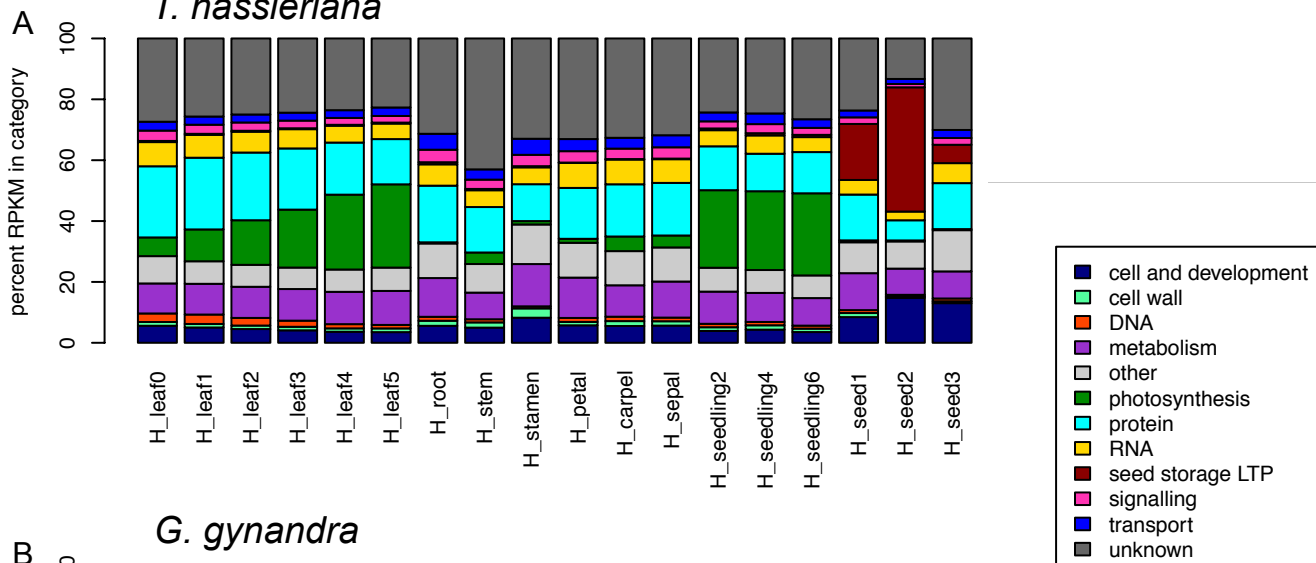*G. gynandra*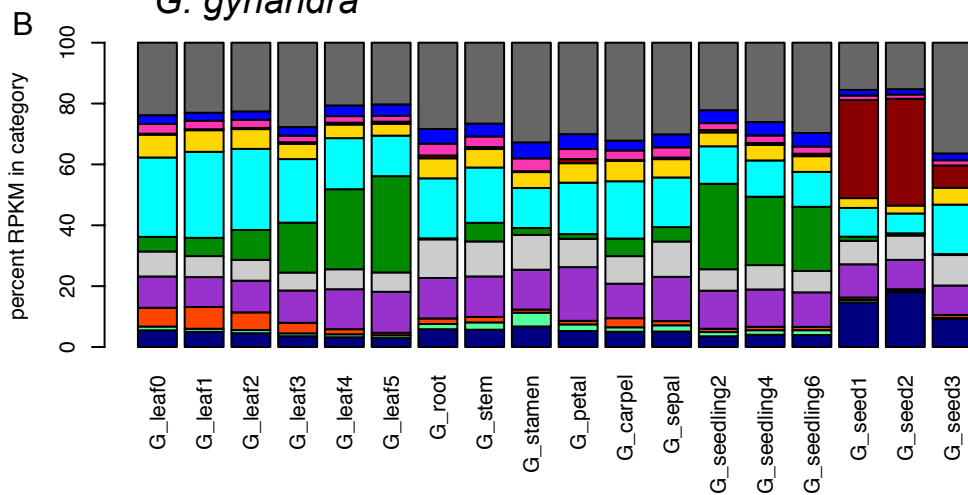

**Supplemental Figure 10. Transcriptional investment of each tissue compared in both species.** Cumulative average RPKMs in percent for basal Mapman categories for each tissue in *G. gynandra* and *T. hassleriana*.

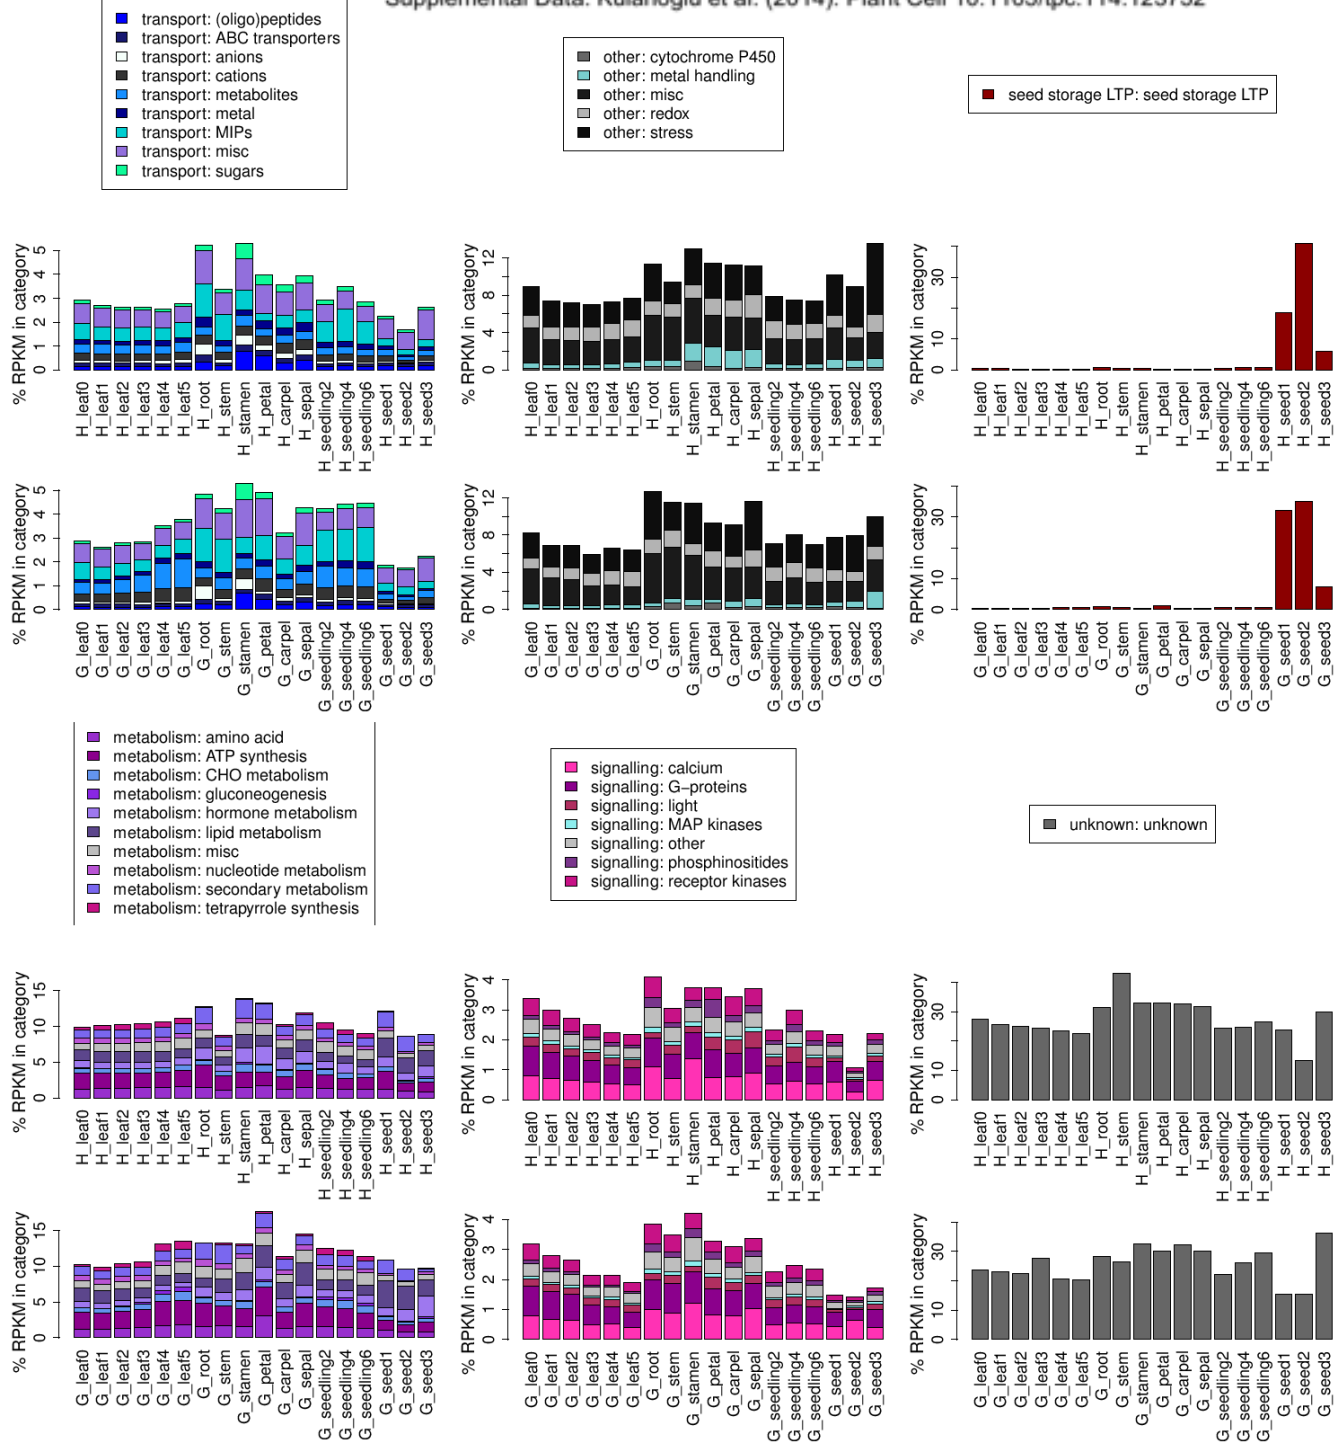

**Supplemental Figure 11.1. Transcriptional investment at secondary Mapman category of each tissue compared in both species (Part 1).** Distribution of the Mapman categories in each tissue in *G. gynandra* and *T. hassleriana*. Plot shows percent of average RPKMs of the 12 customized secondary Mapman bins for each tissue.

- cell and development: cell misc
- cell and development: cell cycle
- cell and development: cell division
- cell and development: cell organization
- cell and development: late embryogenesis abundant
- cell and development: misc development
- cell and development: storage proteins
- cell and development: vesicle transport

- cell wall: cell wall proteins
- cell wall: cellulose synthesis
- cell wall: degradation
- cell wall: hemicellulose synthesis
- cell wall: modification
- cell wall: pectin esterases
- cell wall: pectin synthesis
- cell wall: precursor synthesis

- DNA: histones
- DNA: repair
- DNA: retrotransposon/transposase
- DNA: synthesis/chromatin
- DNA: unspecified

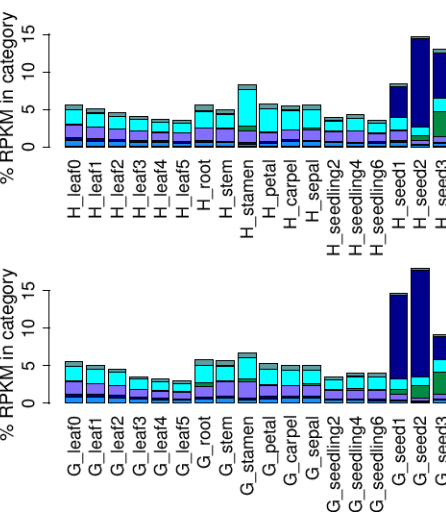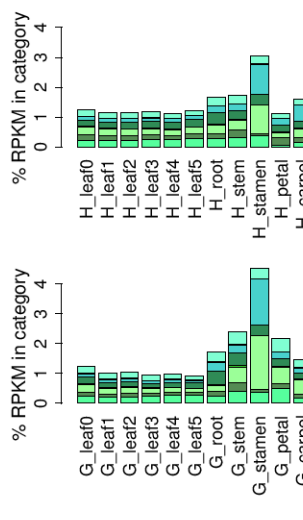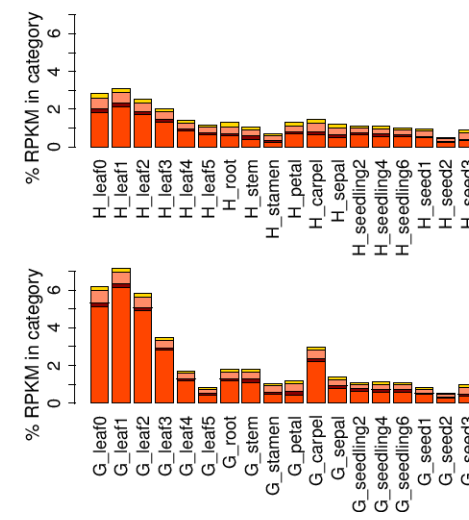

- photosynthesis: calvin cycle
- photosynthesis: light rxns
- photosynthesis: photorespiration
- photosynthesis: PS I
- photosynthesis: PS misc
- photosynthesis: PSII
- photosynthesis: Rubisco

- protein: aa activation
- protein: degradation other
- protein: degradation ubiquitin
- protein: assembly and folding
- protein: postranslational modification
- protein: synthesis
- protein: targeting

- RNA: micro RNA, natural antisense etc
- RNA: processing
- RNA: RNA binding
- RNA: TFs
- RNA: transcription

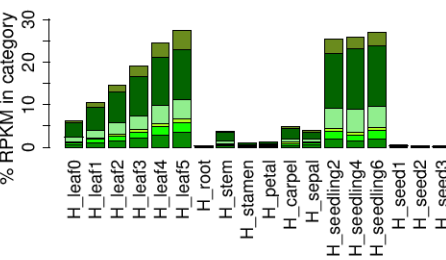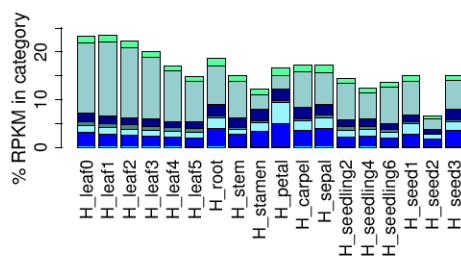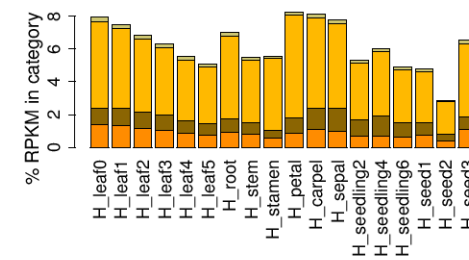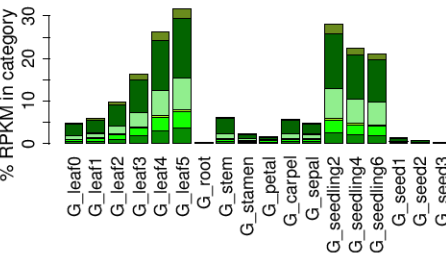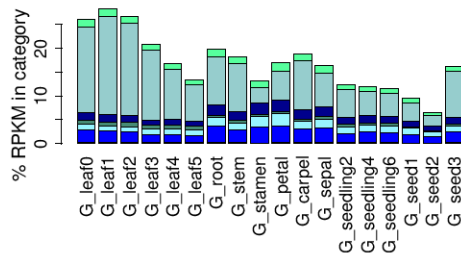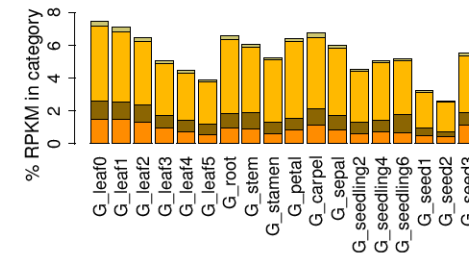

**Supplemental Figure 11.2. Transcriptional investment at secondary Mapman category of each tissue compared in both species (Part 2).** Distribution of the Mapman categories in each tissue in *G. gynandra* and *T. hassleriana*. Plot shows percent of average RPKMs of the 12 customized secondary Mapman bins for each tissue.

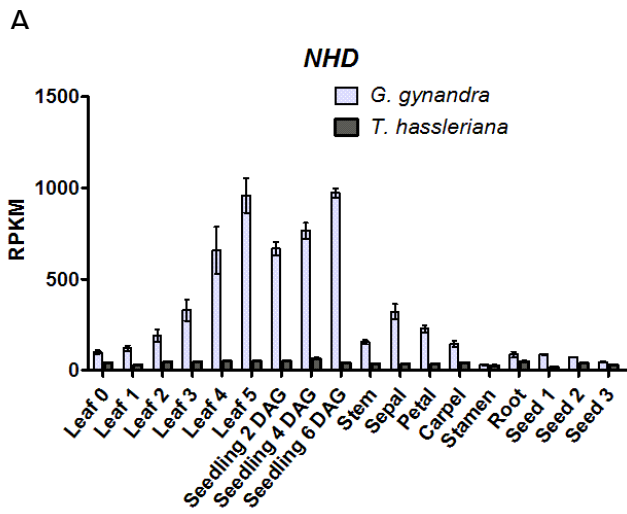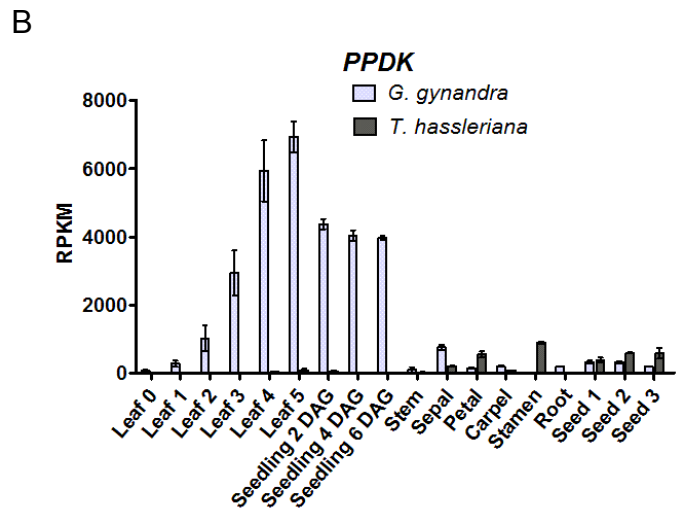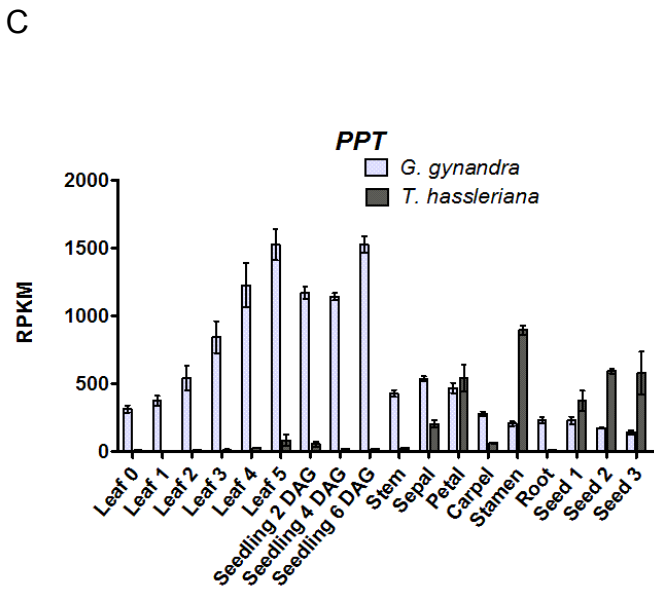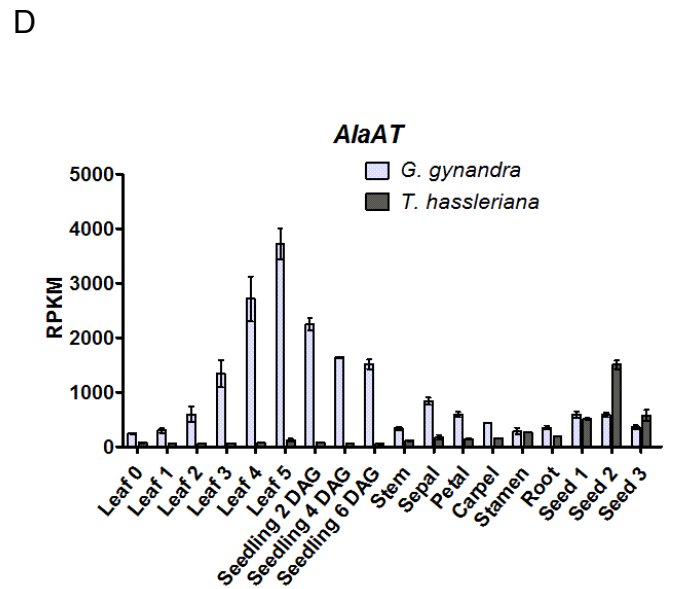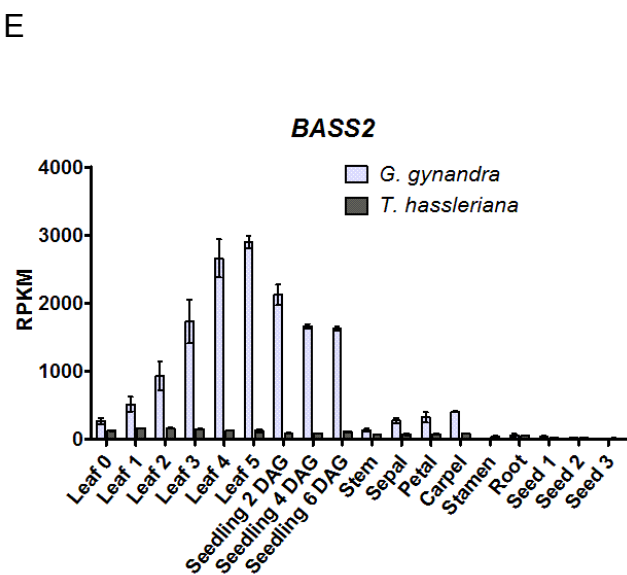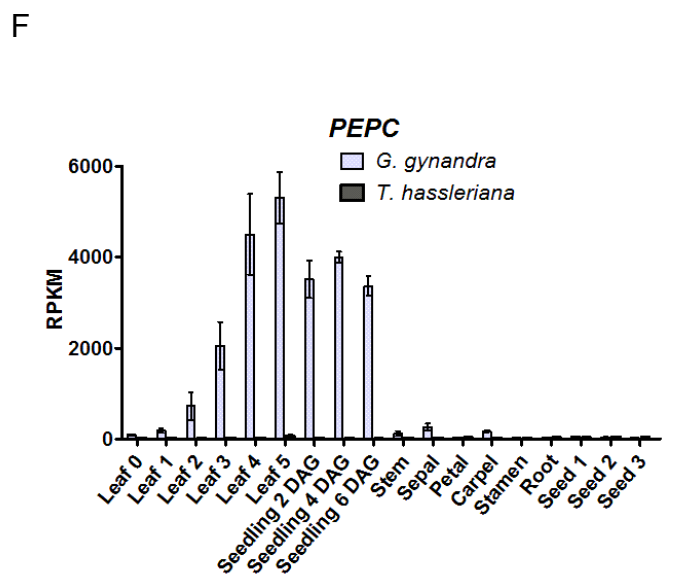

**Supplemental Figure 12. Comparison of gene expression dynamics within the leaf gradient of both species.**

(A-F) Average expression pattern of highest abundant putative ortholog of  $C_4$  cycle genes (*NHD*, *PPDK*, *PPT*, *AlaAT*, *BASS2*, *PEPC*) in photo- and heterotrophic tissues in *G. gynandra* (light grey) and *T. hassleriana* (dark grey); ( $n=3 \pm$  SE, standard error)

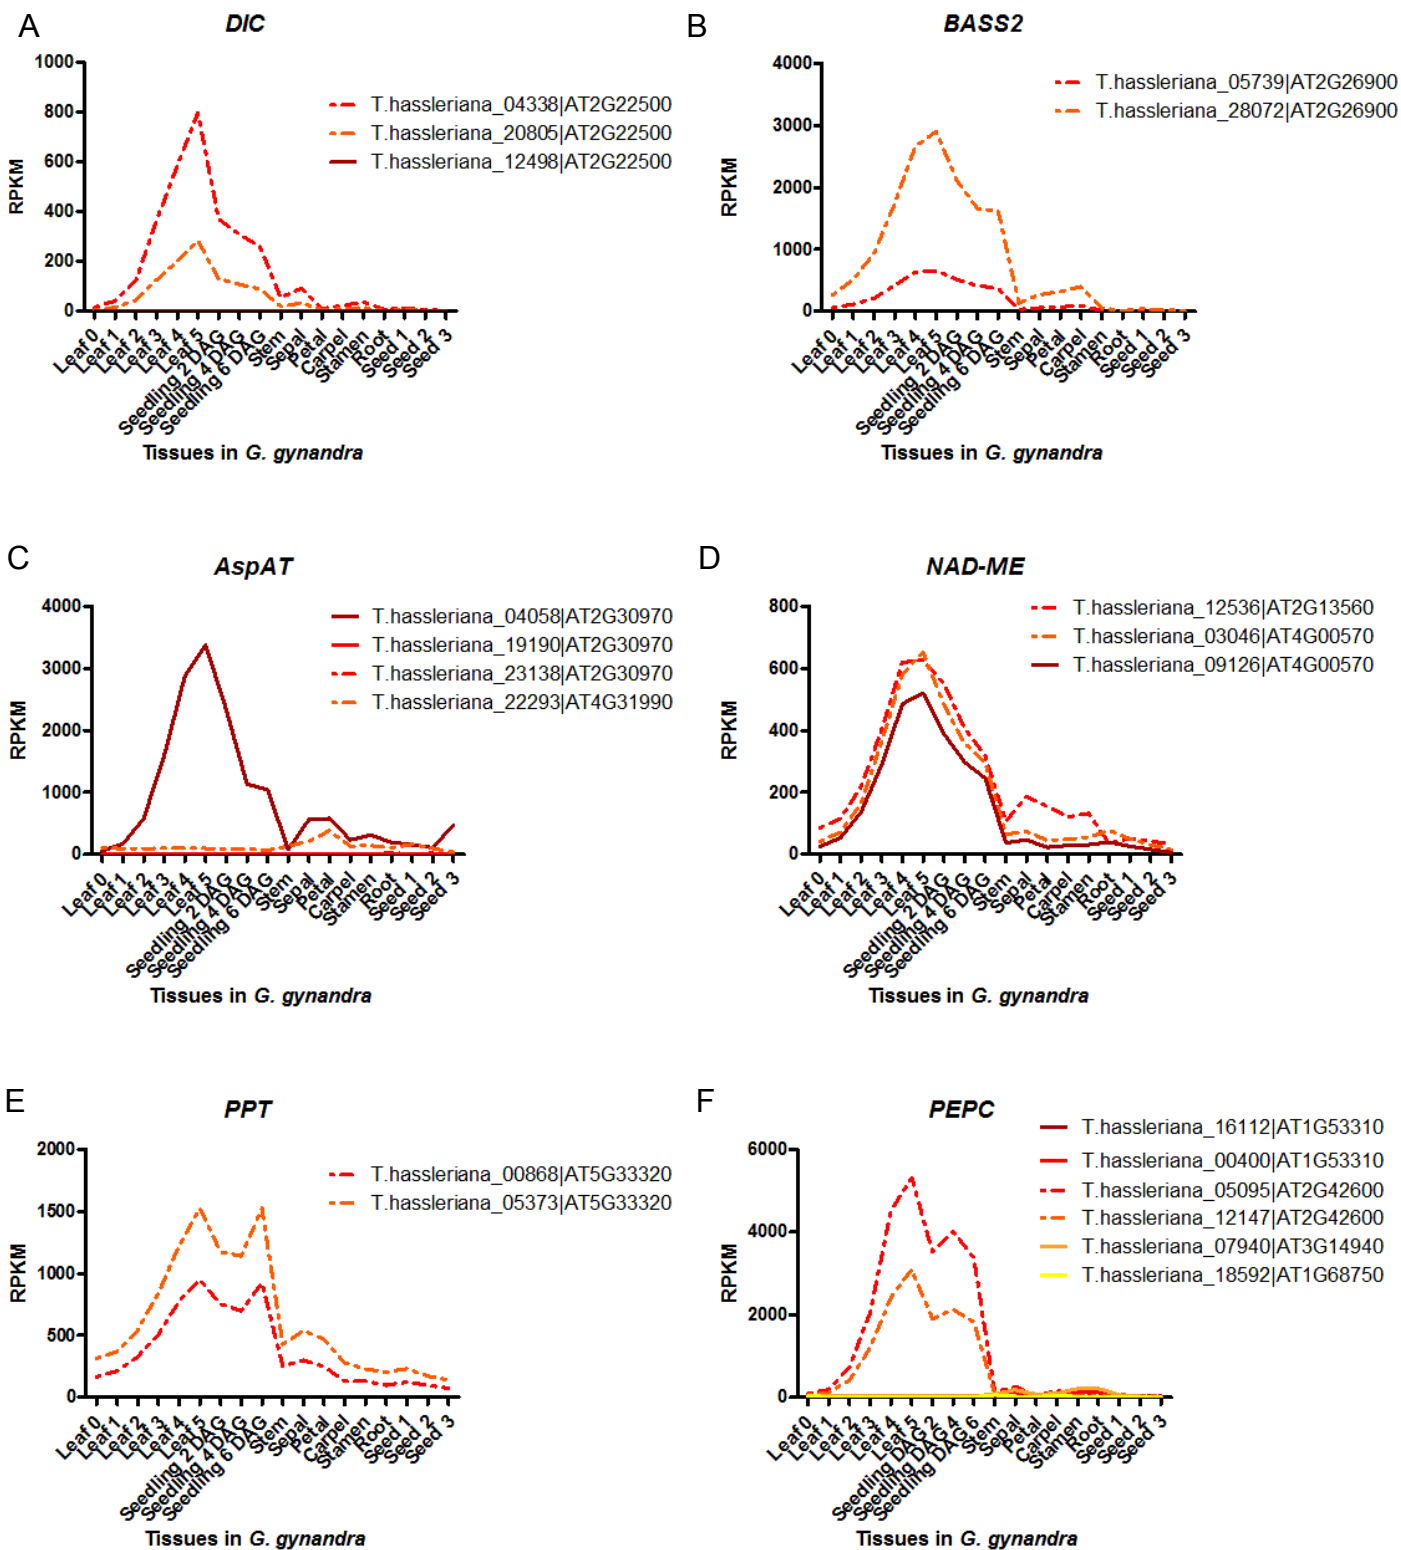

**Supplemental Figure online 13.** Plot of all  $C_4$  gene putative orthologs expression pattern (RPKM) in *G. gynandra*, that were annotated as  $C_4$  genes with AGI identifier and respective *T. hassleriana* ID. (A-F) Average expression pattern of putative ortholog of  $C_4$  cycle genes (*DIC*, *BASS2*, *AspAT*, *NAD-ME*, *PPT*, *PEPC*) in photo- and heterotrophic tissues in *G. gynandra* (n=3).



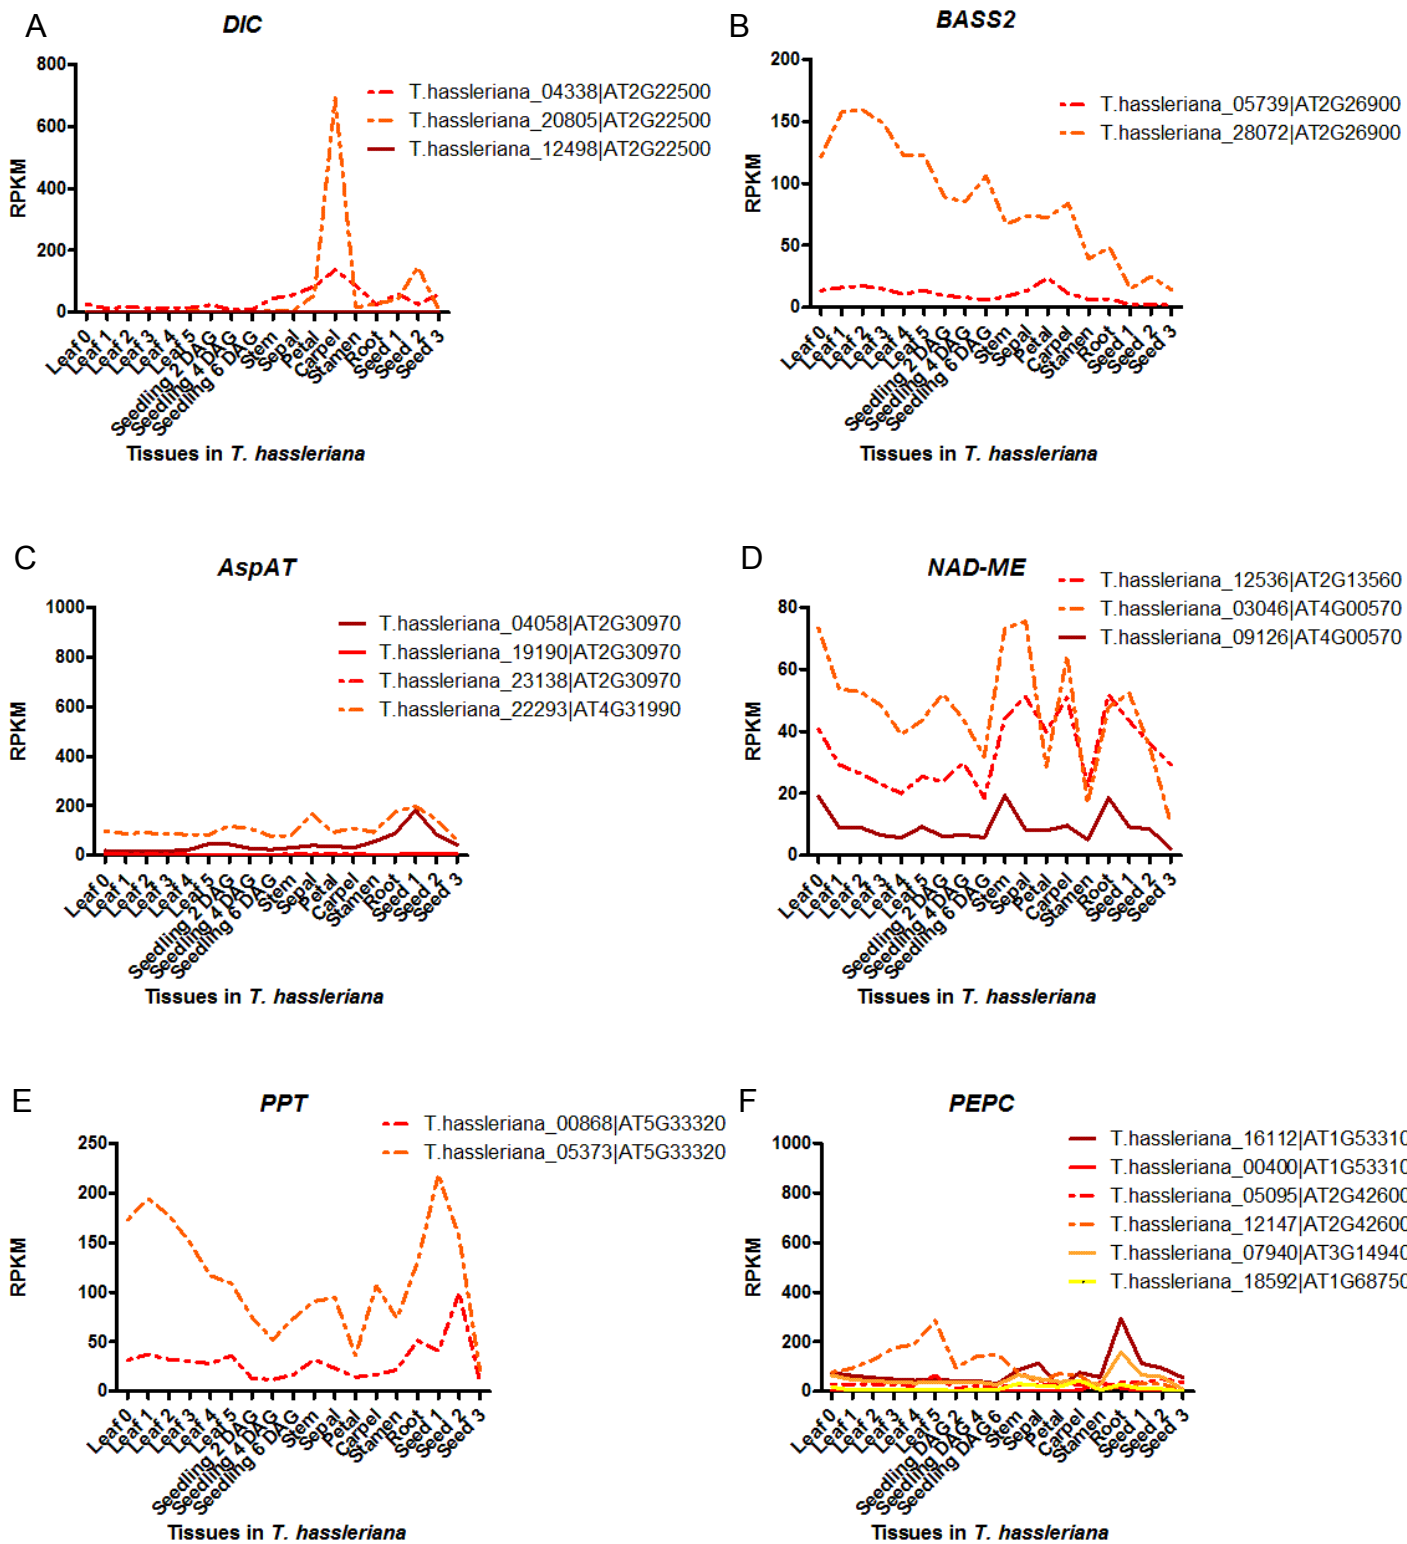

**Supplemental Figure online 14.** Plot of all  $C_4$  gene putative orthologs expression pattern (RPKM) in *T. hassleriana*, that were annotated as  $C_4$  genes with AGI identifier and respective *T. hassleriana* ID. (A-F) Average expression pattern of putative ortholog of  $C_4$  cycle genes (*DIC*, *BASS2*, *AspAT*, *NAD-ME*, *PPT*, *PEPC*) in photo- and heterotrophic tissues in *T. hassleriana* (n=3).



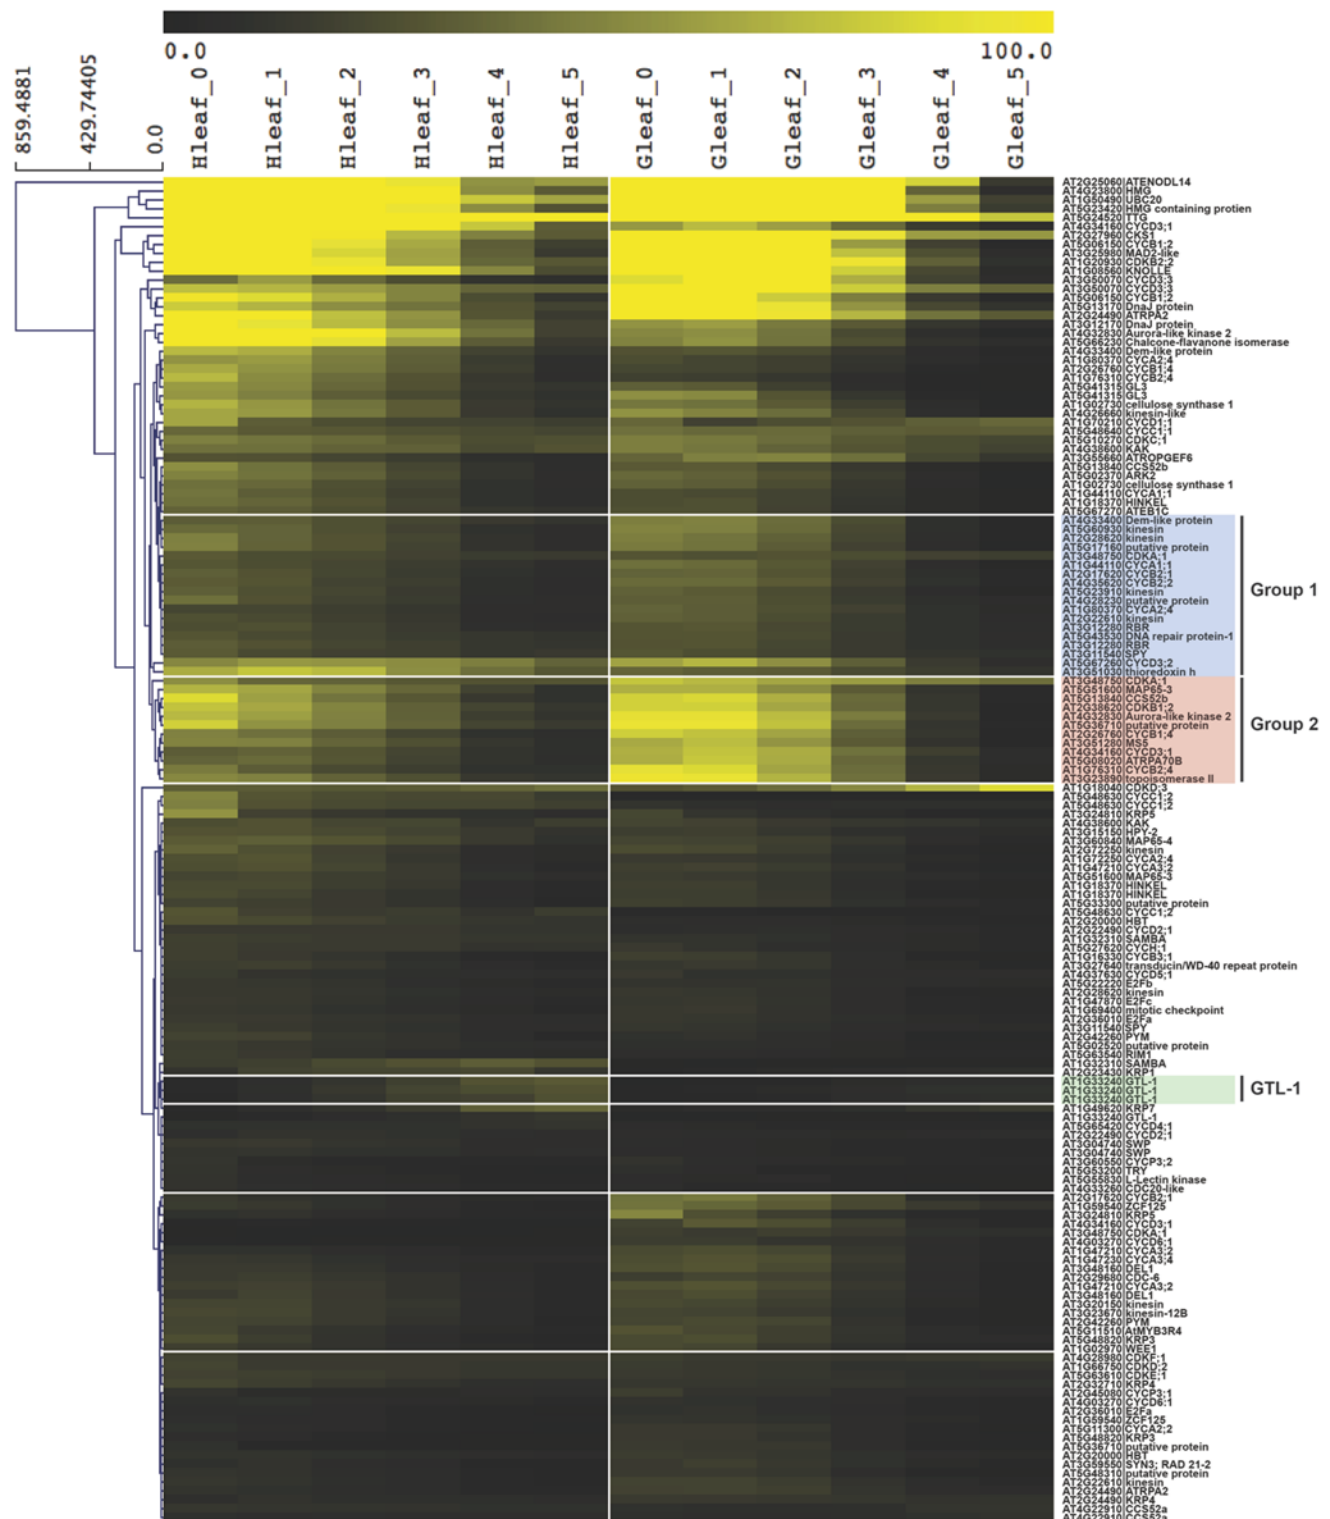

**Supplemental Figure 16. Hierarchical clustering of average RPKM with Euclidean distance of core cell cycle genes in *T. hassleriana* and *G. gynandra*.** Core cell cycle genes were extracted from (Vandepoele et al., 2002; Beemster et al., 2005). Deregulated cluster of interest are marked with blue and red boxes. *GTL1* cluster is highlighted with green box.

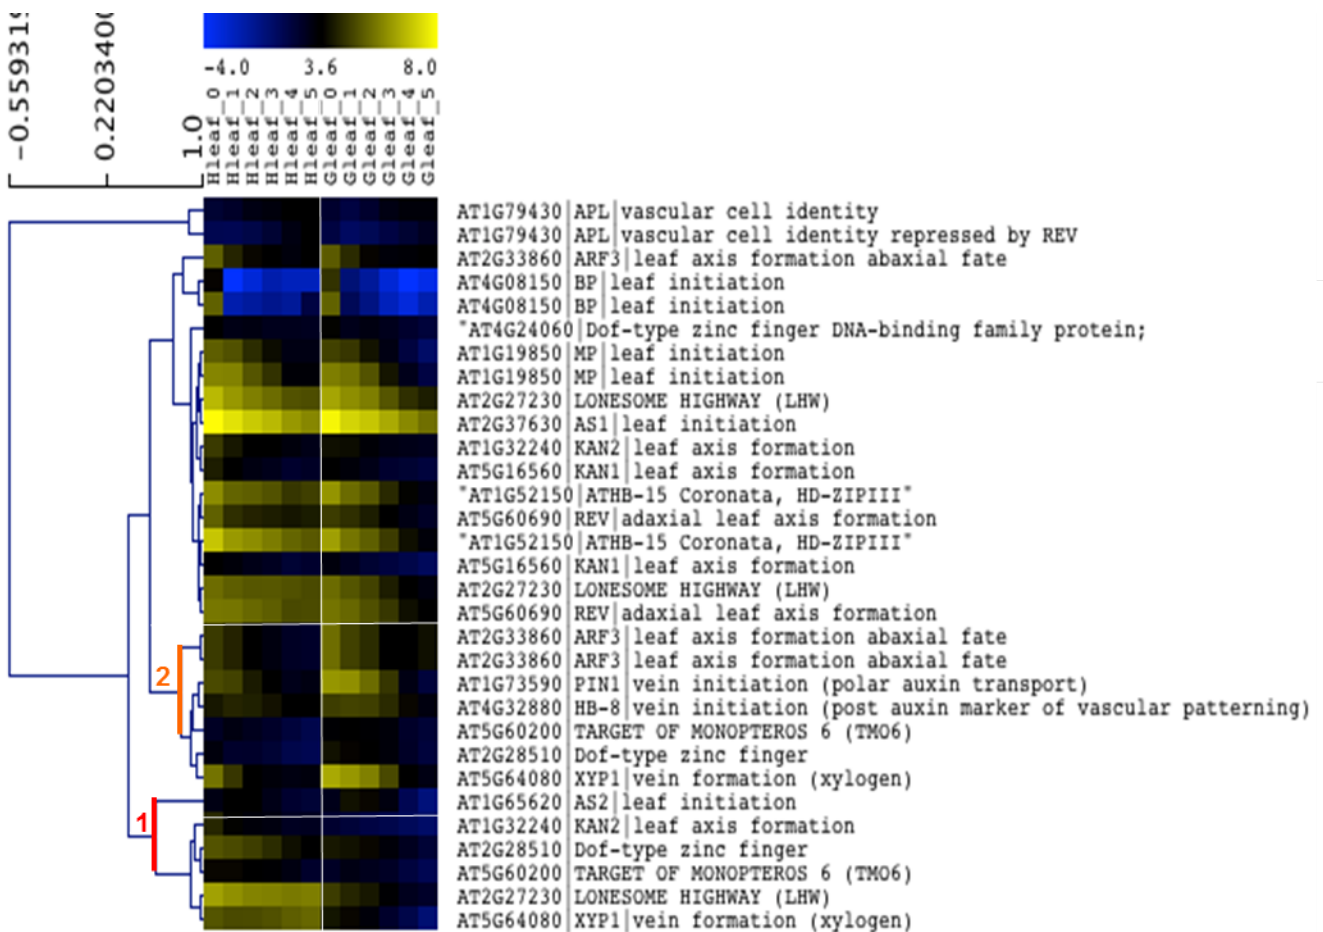

**Supplemental Figure 17. Hierarchical clustering with Pearson's correlation of leaf developmental factors.** Averaged transcript abundances (RPKM) of leaf gradient sample of transcriptional regulators involved in axial and vasculature fate determination were clustered. Group 1 (orange) and group 2 (red) show genes that are altered between *T. hassleriana* (H) and *G. gynandra* (G).

A

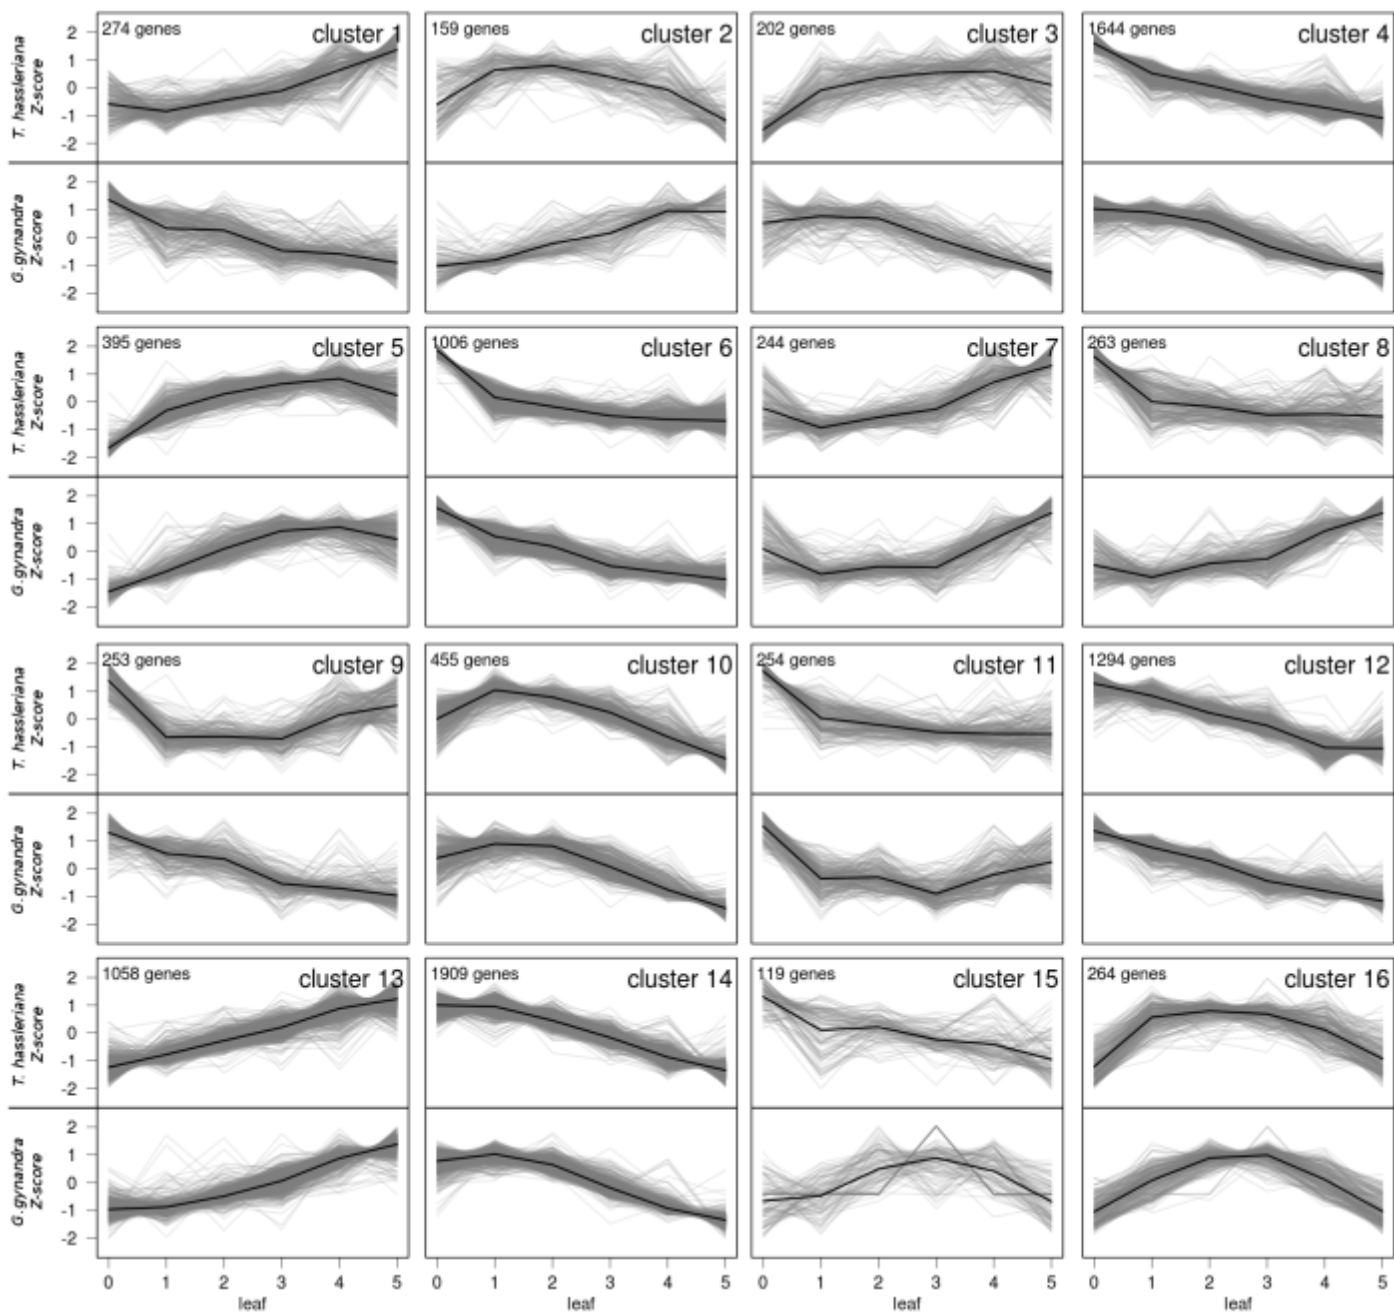

B

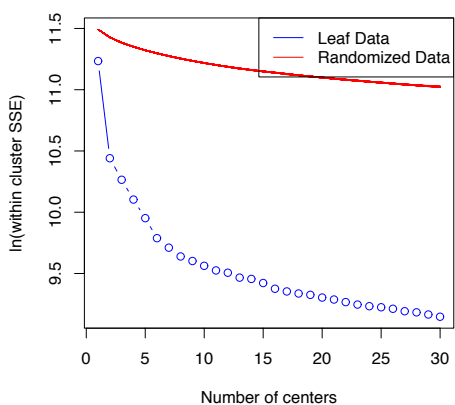

**Supplemental Figure 18. K-means clustering of leaf gradient expression data and quality assessment.** (A) K-means clustering of transcript abundances (RPKM) of leaf stage averages ( $n=3$ ) between *T. hassleriana* and *G. gynandra* shown as species-scaled Z-scores. Size of each cluster is indicated in each cluster box. (B) Ln of the sum of the squared euclidean distance (SSE) between each gene and the center of its cluster across various numbers of clusters calculated with a K-means algorithm for the leaf gradient data (blue) compared to the average of 250 scrambled datasets (red).

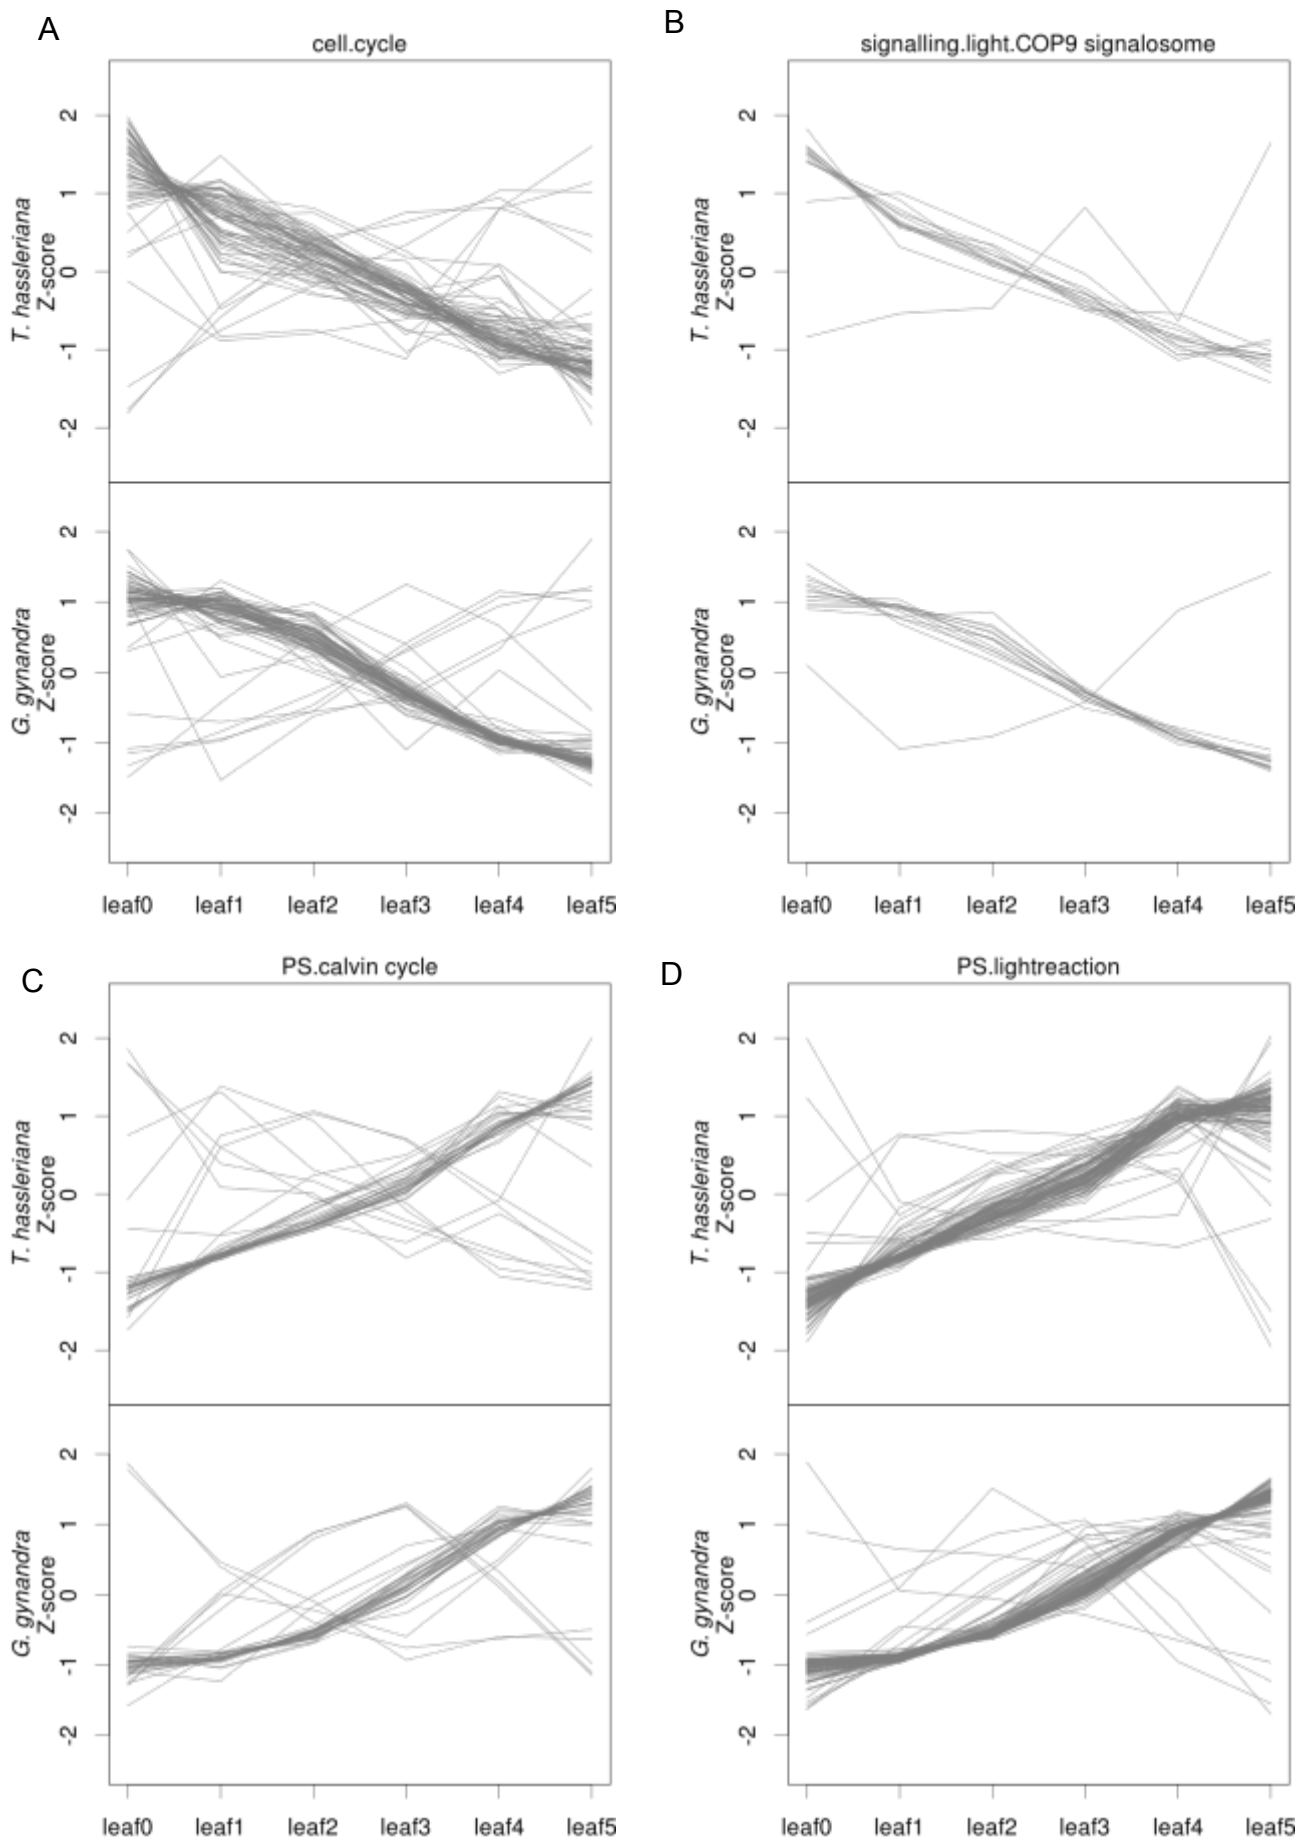

**Supplemental Figure 19. Z-score plots of enriched mapman categories in the shifted clusters.** Species scaled Z-scores from averaged transcript abundances (RPKM) for each leaf stage per species (n=3). **(A,B)** shifted enriched categories from cluster 4. **(C,D)** shifted enriched categories from cluster 13. Number in brackets are the respective Mapman category bin codes.



A

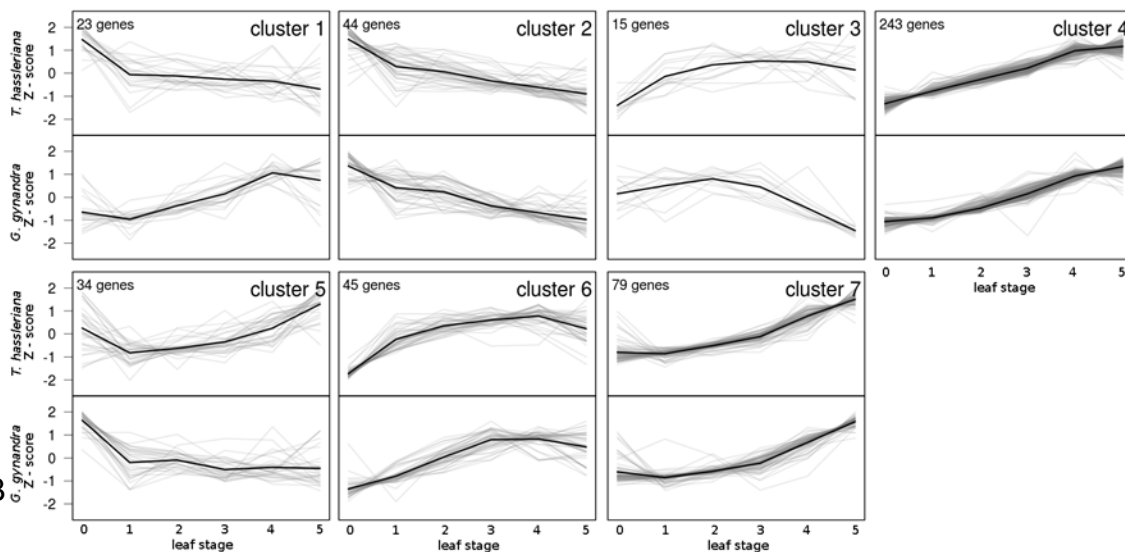

B

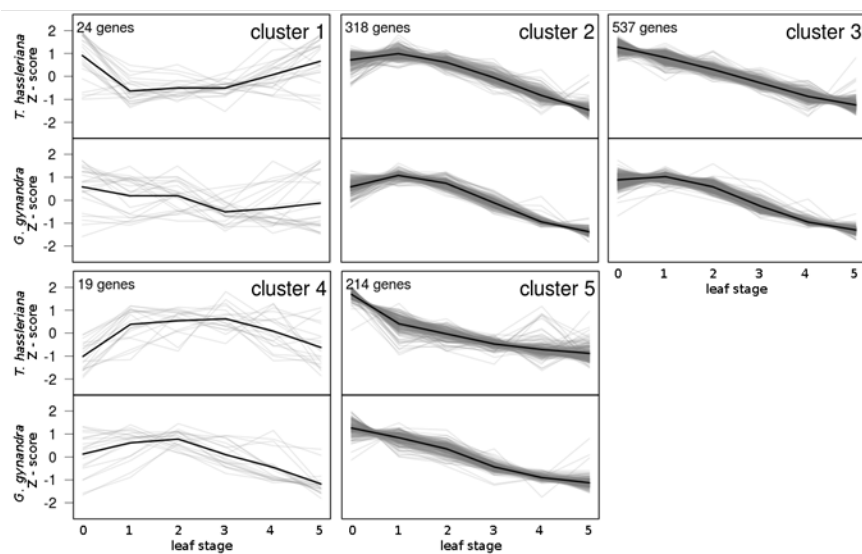

C

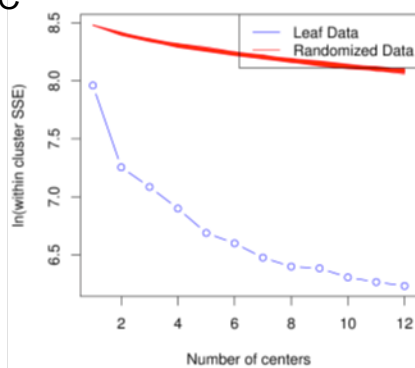

D

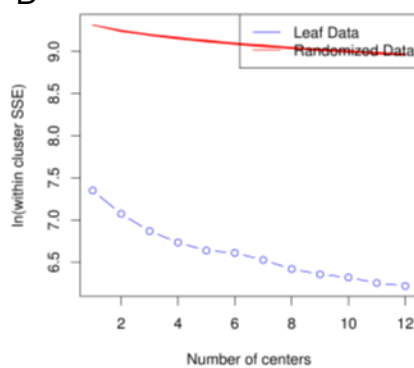

**Supplemental Figure 20. K-means clustering of genes differentially regulated during the transition from proliferation to enlargement. (A,B)** K-means clustering of *T. hassleriana* and *G. gynandra* homologs of gene set that is significantly up-regulated (**A**;  $p$ -value $<0.05$ ) or down-regulated (**B**;  $p$ -value $<0.05$ ) between day 9 and 10 day in developing *A. thaliana* leaves (Andriankaja et al., 2012). Per species scaled Z-scores from averaged transcript abundances (RPKM) for each leaf stage per species ( $n=3$ ). (**C,D**) Ln of the sum of the squared Euclidean distance (SSE) between each gene and the center of its clusters across various numbers of clusters calculated with a K-means algorithm for the leaf gradient data (blue) compared to the average of 250 scrambled datasets (red) for (**C**) up- and (**D**) down-regulated.

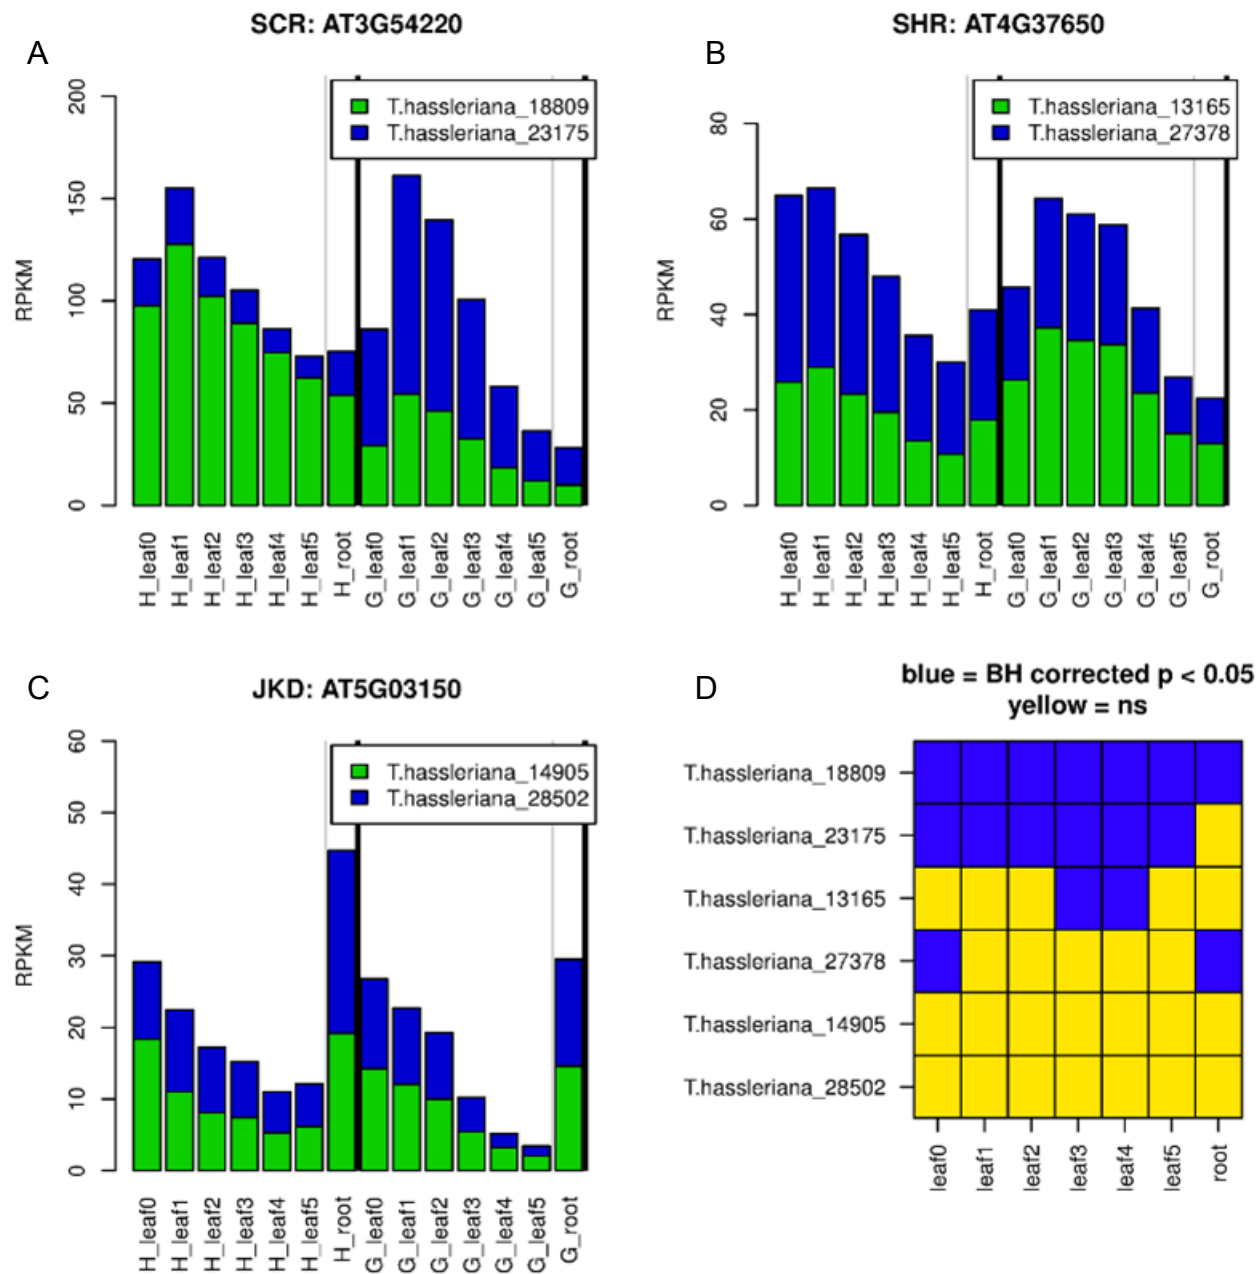

**Supplemental Figure 21. Transcript abundances of SCARECROW and SHORTROOT homologs in *G. gynandra* (G) and *T. hassleriana* (H) leaf and root.**

(A-C) Expression pattern (average RPKM; n=3) of all homologs of SCARECROW (SCR; A); SHORTROOT (SHR; B) and JACKDAW (JKD; C) in both species. (D) Dual color map of significant (blue; FWE corrected p-Value<0.05) or non significant (yellow; n.s) expressed transcripts of SCR, SHR and JKD.

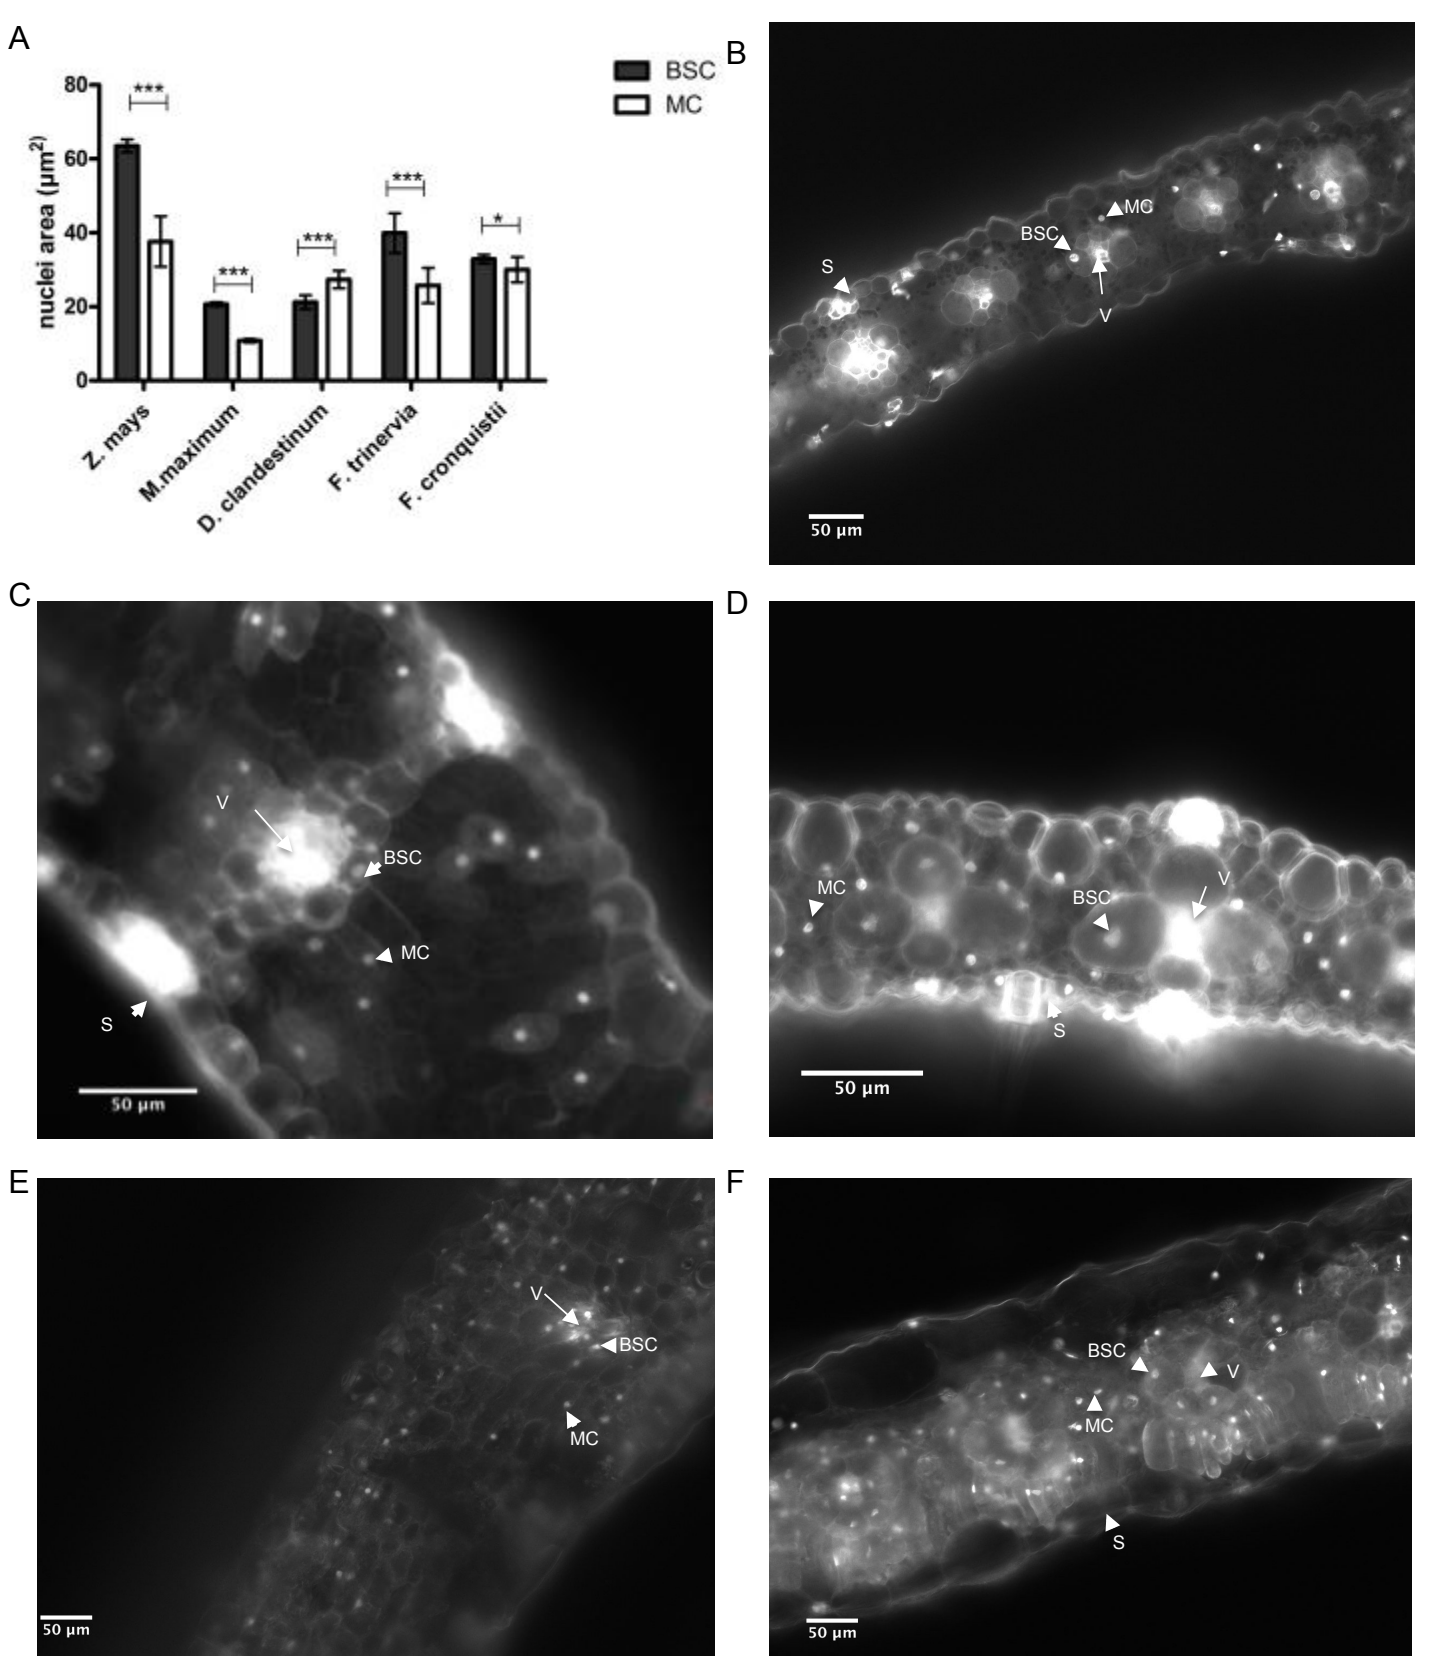

**Supplemental Figure 22. Nuclei area and images of C<sub>4</sub> and C<sub>3</sub> species.**

**(A)** Quantification of BSC and MC nuclei area of mature leaves of monocotyledonous (*Zea mays*; *Megathyrus maximus*; *Dichantelium clandestinum*) and dicotyledonous (*Flaveria trinervia*; *Flaveria cronquistii*) C<sub>4</sub> and C<sub>3</sub> species cross sections (error bars  $\pm$ SD; n=3). Area of nuclei is given as  $\mu\text{m}^2$  with at least 100 nuclei analyzed per cell type per species. Asterisks indicate statistically significant differences between BSC and MC (\*\*\*) p-value<0.001; \* p-value<0.05). **(B-F)** Microscopic fluorescence images of propidium iodide stained mature leaf cross sections of *Zea mays*, C<sub>4</sub> (**B**); *Dichantelium clandestinum*, C<sub>3</sub> (**C**); *Megathyrus maximus*, C<sub>4</sub> (**D**); *Flaveria cronquistii*, C<sub>3</sub> (**E**); *Flaveria trinervia*, C<sub>4</sub> (**F**). Scale bar: 50  $\mu\text{m}$ ; closed arrows pointing to nuclei of indicated cell type. BSC: bundle sheath cell; MC: mesophyll cell; V: vein; S: stomata.

**Supplemental Table 1 online. Velvet/OASES assembly stats from *G. gynandra* and *T. hassleriana* paired end reads.** Backmapping of paired end reads was performed with TopHat standard settings. Annotation via blastp against TAIR10 proteome.

|                               | <i>G. gynandra</i> (C <sub>4</sub> ) | <i>T. hassleriana</i> (C <sub>3</sub> ) |
|-------------------------------|--------------------------------------|-----------------------------------------|
| <b>k-mer</b>                  | 31                                   | 31                                      |
| <b>N50 contig</b>             | 1916                                 | 1996                                    |
| <b>unigenes</b>               | 59471                                | 52479                                   |
| <b>total transcripts</b>      | 176850                               | 163456                                  |
| <b>Backmapping %</b>          | 60                                   | 63                                      |
| <b>Annotation of TAIR10 %</b> | 86                                   | 87                                      |

**Supplemental Table 2 online. Cross species mapping results.** *T. hassleriana* Leaf 5, Seed 1, Stamen (n=3) was mapped to *A. thaliana* via blat in translated protein (A) mode to assess sensitivity of cross species mapping. Results of mapping were normalized as RPKM and collapsed on 1 AGI per multiple identifier in *T. hassleriana* Pearson's correlation *r* values of collapsed *T. hassleriana* Leaf 5, Seed 1 and Stamen (n=3) mapped to *A. thaliana* (B) and to itself were calculated (C).

| Species               | Sample    | Total number of cleaned reads | Total number of mapped reads | Mapping efficiency                  | Number of genes >20 RPKM | Number of genes >1000 RPKM |
|-----------------------|-----------|-------------------------------|------------------------------|-------------------------------------|--------------------------|----------------------------|
|                       |           |                               |                              | against <i>A.thaliana</i> reference |                          |                            |
| <i>T. hassleriana</i> | Hleaf5_1  | 41085063                      | 23502678                     | 57.20492141                         | 5825                     | 151                        |
|                       | Hleaf5_2  | 26393836                      | 22289304                     | 84.44889936                         | 5675                     | 122                        |
|                       | Hleaf5_3  | 67907227                      | 43184738                     | 63.59372913                         | 5684                     | 146                        |
|                       | Hstamen_1 | 46237107                      | 27726175                     | 59.96520284                         | 5923                     | 48                         |
|                       | Hstamen_2 | 48025041                      | 28220020                     | 58.76105343                         | 5950                     | 47                         |
|                       | Hstamen_3 | 17855771                      | 14433105                     | 80.83159781                         | 5467                     | 60                         |
|                       | Hseed1_1  | 38620315                      | 21654259                     | 56.06960741                         | 6253                     | 39                         |
|                       | Hseed1_2  | 28792149                      | 17462026                     | 60.64856777                         | 6301                     | 48                         |
|                       | Hseed1_3  | 25372947                      | 14217549                     | 56.03428329                         | 6107                     | 42                         |

| collapsed expression by mapping to own cds vs to <i>A. thaliana</i> |    | 1vs1 | 2vs2 | 3vs3 | average |
|---------------------------------------------------------------------|----|------|------|------|---------|
| Hleaf5                                                              | r  | 0.90 | 0.89 | 0.91 | 0.90    |
|                                                                     | r2 | 0.81 | 0.80 | 0.82 | 0.81    |
| Hstamen                                                             | r  | 0.79 | 0.79 | 0.79 | 0.79    |
|                                                                     | r2 | 0.62 | 0.62 | 0.62 | 0.62    |
| Hseed1                                                              | r  | 0.91 | 0.86 | 0.9  | 0.89    |
|                                                                     | r2 | 0.83 | 0.74 | 0.81 | 0.79    |

| <i>T. hassleriana</i> mapped to <i>A. thaliana</i> |    | 1vs2 | 1vs3 | 2vs3 | average |
|----------------------------------------------------|----|------|------|------|---------|
| Hleaf5                                             | r  | 0.98 | 1.00 | 0.98 | 0.99    |
|                                                    | r2 | 0.97 | 0.99 | 0.96 | 0.97    |
| Hstamen                                            | r  | 0.97 | 0.96 | 0.98 | 0.97    |
|                                                    | r2 | 0.94 | 0.92 | 0.96 | 0.94    |
| Hseed1                                             | r  | 0.97 | 0.99 | 0.98 | 0.98    |
|                                                    | r2 | 0.94 | 0.98 | 0.96 | 0.96    |

**Supplemental Table 3 online.** Pearson's correlation ( $r$ ) of each individual replicate per tissue in *G. gynandra* and *T. hassleriana* respectively (A). Pearson's correlation between *G. gynandra* and *T. hassleriana* individual tissues (B).

A

| #  | Pearson correlation $r$ between biological replicates |                   |        |        |        |
|----|-------------------------------------------------------|-------------------|--------|--------|--------|
|    | Species                                               | Tissue            | 1 vs 2 | 1 vs 3 | 2 vs 3 |
| 1  | <i>G. gynandra</i>                                    | <b>Gleaf0</b>     | 0.98   | 0.99   | 0.99   |
| 2  |                                                       | <b>Gleaf1</b>     | 0.97   | 0.96   | 0.98   |
| 3  |                                                       | <b>Gleaf2</b>     | 0.95   | 0.92   | 0.98   |
| 4  |                                                       | <b>Gleaf3</b>     | 0.79   | 0.92   | 0.93   |
| 5  |                                                       | <b>Gleaf4</b>     | 0.81   | 0.97   | 1.00   |
| 6  |                                                       | <b>Gleaf5</b>     | 0.99   | 0.99   | 0.99   |
| 7  |                                                       | <b>Groot</b>      | 0.92   | 0.93   | 0.93   |
| 8  |                                                       | <b>Gstem</b>      | 0.97   | 0.94   | 0.95   |
| 9  |                                                       | <b>Gstamen</b>    | 0.61   | 0.61   | 0.97   |
| 10 |                                                       | <b>Gpetal</b>     | 0.88   | 0.84   | 0.84   |
| 11 |                                                       | <b>Gcarpel</b>    | 0.99   | 0.61   | 0.57   |
| 12 |                                                       | <b>Gsepal</b>     | 1.00   | 0.97   | 0.97   |
| 13 |                                                       | <b>Gseedling2</b> | 0.99   | 0.98   | 0.99   |
| 14 |                                                       | <b>Gseedling4</b> | 0.90   | 0.92   | 0.99   |
| 15 |                                                       | <b>Gseedling6</b> | 0.70   | 0.99   | 0.75   |
| 16 |                                                       | <b>Gseed1</b>     | 0.99   | 0.99   | 1.00   |
| 17 |                                                       | <b>Gseed2</b>     | 1.00   | 1.00   | 1.00   |
| 18 |                                                       | <b>Gseed3</b>     | 0.77   | 0.64   | 0.94   |
| 19 | <i>T. hassleriana</i>                                 | <b>Hleaf0</b>     | 0.97   | 0.97   | 0.99   |
| 20 |                                                       | <b>Hleaf1</b>     | 0.97   | 0.98   | 0.98   |
| 21 |                                                       | <b>Hleaf2</b>     | 0.96   | 0.98   | 0.98   |
| 22 |                                                       | <b>Hleaf3</b>     | 0.96   | 0.99   | 0.98   |
| 23 |                                                       | <b>Hleaf4</b>     | 0.96   | 0.99   | 0.98   |
| 24 |                                                       | <b>Hleaf5</b>     | 0.97   | 0.99   | 0.98   |
| 25 |                                                       | <b>Hroot</b>      | 0.95   | 0.96   | 0.96   |
| 26 |                                                       | <b>Hstem</b>      | 0.23   | 0.62   | 0.87   |
| 27 |                                                       | <b>Hstamen</b>    | 0.94   | 0.91   | 0.98   |
| 28 |                                                       | <b>Hpetal</b>     | 0.98   | 0.97   | 0.97   |
| 29 |                                                       | <b>Hcarpel</b>    | 0.95   | 0.99   | 0.98   |
| 30 |                                                       | <b>Hsepal</b>     | 0.87   | 0.86   | 0.90   |
| 31 |                                                       | <b>Hseedling2</b> | 0.99   | 0.99   | 0.98   |
| 32 |                                                       | <b>Hseedling4</b> | 0.99   | 1.00   | 0.99   |
| 33 |                                                       | <b>Hseedling6</b> | 0.82   | 0.82   | 0.98   |
| 34 |                                                       | <b>Hseed1</b>     | 0.99   | 1.00   | 0.99   |
| 35 |                                                       | <b>Hseed2</b>     | 1.00   | 1.00   | 1.00   |
| 36 |                                                       | <b>Hseed3</b>     | 0.93   | 0.96   | 0.95   |



**Supplemental Table 3 online.** Pearson's correlation ( $r$ ) of each individual replicate per tissue in *G. gynandra* and *T. hassleriana* respectively (A). Pearson's correlation between *G. gynandra* and *T. hassleriana* individual tissues (B).

B

| <b>Pearson Correlation <math>r</math> between<br/><i>G. gynandra</i> and <i>T. hassleriana</i></b> |                  |                       |
|----------------------------------------------------------------------------------------------------|------------------|-----------------------|
| <b>#</b>                                                                                           | <b>Tissue</b>    | <b><math>r</math></b> |
| 1                                                                                                  | <b>Leaf0</b>     | 0.723369664           |
| 2                                                                                                  | <b>Leaf1</b>     | 0.693967315           |
| 3                                                                                                  | <b>Leaf2</b>     | 0.774414647           |
| 4                                                                                                  | <b>Leaf3</b>     | 0.718280077           |
| 5                                                                                                  | <b>Leaf4</b>     | 0.845767325           |
| 6                                                                                                  | <b>Leaf5</b>     | 0.801946455           |
| 7                                                                                                  | <b>Root</b>      | 0.693418487           |
| 8                                                                                                  | <b>Stem</b>      | 0.397920288           |
| 9                                                                                                  | <b>Stamen</b>    | 0.465027959           |
| 10                                                                                                 | <b>Petal</b>     | 0.296842384           |
| 11                                                                                                 | <b>Carpel</b>    | 0.409336161           |
| 12                                                                                                 | <b>Sepal</b>     | 0.216833607           |
| 13                                                                                                 | <b>Seedling2</b> | 0.864093832           |
| 14                                                                                                 | <b>Seedling4</b> | 0.79602302            |
| 15                                                                                                 | <b>Seedling6</b> | 0.757896499           |
| 16                                                                                                 | <b>Seed1</b>     | 0.922002838           |
| 17                                                                                                 | <b>Seed2</b>     | 0.882400443           |
| 18                                                                                                 | <b>Seed3</b>     | 0.612106172           |

**Supplemental Table 4 online.** Number of significantly up- or downregulated genes in *G. gynandra* compared to *T. hassleriana* within the different tissues. Differential expressed gene p-Values were calculated via EdgeR and Bonferroni-Holms corrected, genes with  $p < 0.05$  were classified as differential regulated.

| Tissue    | UP p< 0.05 | UP p< 0.01  | UP p< 0.001 | DOWN p< 0.05 | DOWN p< 0.01 | DOWN p< 0.001 |
|-----------|------------|-------------|-------------|--------------|--------------|---------------|
| leaf0     | 5435       | 5061        | 4539        | 6076         | 5696         | 5237          |
| leaf1     | 5197       | 4841        | 4391        | 5914         | 5529         | 5026          |
| leaf2     | 4234       | 3894        | 3443        | 5047         | 4644         | 4204          |
| leaf3     | 4646       | 4283        | 3833        | 5484         | 5070         | 4576          |
| leaf4     | 3250       | 2911        | 2511        | 3774         | 3399         | 2979          |
| leaf5     | 3236       | 2894        | 2447        | 4133         | 3716         | 3191          |
| root      | 4343       | 3973        | 3511        | 5151         | 4755         | 4254          |
| stem      | 7835       | 7497        | 7123        | 8462         | 8129         | 7698          |
| stamen    | 4545       | 4116        | 3652        | 5388         | 4976         | 4451          |
| petal     | 4445       | 4063        | 3613        | 5122         | 4751         | 4317          |
| carpel    | 3718       | 3352        | 2929        | 3640         | 3274         | 2894          |
| sepal     | 5650       | 5276        | 4780        | 6422         | 6023         | 5539          |
| seedling2 | 4012       | 3644        | 3186        | 4354         | 3981         | 3546          |
| seedling4 | 4113       | 3684        | 3202        | 4416         | 4043         | 3569          |
| seedling6 | 2874       | 2534        | 2180        | 3542         | 3154         | 2714          |
| seed1     | 4116       | 3764        | 3321        | 4457         | 4083         | 3591          |
| seed2     | 6600       | 6270        | 5807        | 7075         | 6727         | 6276          |
| seed3     | 6108       | 5725        | 5307        | 7088         | 6674         | 6190          |
| mean      | 4686.5     | 4321.222222 | 3876.388889 | 5308.055556  | 4923.555556  | 4458.444444   |
| max       | 7835       | 7497        | 7123        | 8462         | 8129         | 7698          |

**Supplemental Table 5 online.** List of genes present in root to shoot recruitment module.

| T. hassleriana cds ID (Cheng et al., 2013) | Arabidopsis homologue | Coexpressed with TF | TAIR short annotation                                                             |
|--------------------------------------------|-----------------------|---------------------|-----------------------------------------------------------------------------------|
| T.hassleriana_10164                        | AT1G70410             |                     | beta carbonic anhydrase 4                                                         |
| T.hassleriana_20805                        | AT2G22500             |                     | uncoupling protein 5                                                              |
| <b>T.hassleriana_17885</b>                 | <b>AT5G61590</b>      | <b>ERF</b>          | <b>Integrase-type DNA-binding superfamily protein</b>                             |
| <b>T.hassleriana_27615</b>                 | <b>AT1G04250</b>      | <b>Aux/IAA</b>      | <b>AUX/IAA transcriptional regulator family protein</b>                           |
| <b>T.hassleriana_13599</b>                 | <b>AT5G13180</b>      | <b>VND-I2</b>       | <b>NAC domain containing protein 83</b>                                           |
| T.hassleriana_07159                        | AT4G12730             | Aux/IAA             | FASCICLIN-like arabinogalactan 2                                                  |
| T.hassleriana_22160                        | AT5G57560             |                     | Xyloglucan endotransglucosylase/hydrolase family protein                          |
| T.hassleriana_03276                        | AT1G11545             | Aux/IAA             | xyloglucan endotransglucosylase/hydrolase 8                                       |
| T.hassleriana_11774                        | AT1G43670             |                     | Inositol monophosphatase family protein                                           |
| T.hassleriana_19959                        | AT5G19140             | ERF                 | Aluminium induced protein with YGL and LRDR motifs                                |
| T.hassleriana_13658                        | AT1G25230             | ERF                 | Calcineurin-like metallo-phosphoesterase superfamily protein                      |
| T.hassleriana_11758                        | AT3G14690             | VND-I2              | cytochrome P450, family 72, subfamily A, polypeptide 15                           |
| T.hassleriana_00726                        | AT5G46900             |                     | Bifunctional inhibitor/lipid-transfer protein/seed storage 2S albumin superfamily |
| T.hassleriana_13312                        | AT3G22120             |                     | cell wall-plasma membrane linker protein                                          |
| T.hassleriana_18867                        | AT3G54110             |                     | plant uncoupling mitochondrial protein 1                                          |
| T.hassleriana_22110                        | AT1G14870             |                     | PLANT CADMIUM RESISTANCE 2                                                        |
| T.hassleriana_13333                        | AT5G19190             |                     |                                                                                   |
| T.hassleriana_11698                        | AT3G13950             |                     |                                                                                   |
| T.hassleriana_01980                        | AT5G25265             |                     |                                                                                   |
| T.hassleriana_04483                        | AT5G62900             |                     |                                                                                   |
| T.hassleriana_21987                        | AT1G13700             | ERF                 | 6-phosphogluconolactonase 1                                                       |
| T.hassleriana_15837                        | AT1G05000             |                     | Phosphotyrosine protein phosphatases superfamily protein                          |
| T.hassleriana_08797                        | AT5G23750             | Aux/IAA             | Remorin family protein                                                            |
| T.hassleriana_08517                        | AT5G36160             |                     | Tyrosine transaminase family protein                                              |
| T.hassleriana_12936                        | AT5G25980             |                     | glucoside glucohydrolase 2                                                        |
| T.hassleriana_04639                        | AT2G01660             |                     | plasmodesmata-located protein 6                                                   |
| T.hassleriana_22812                        | AT4G21870             | ERF                 | HSP20-like chaperones superfamily protein                                         |
| T.hassleriana_10363                        | AT3G11660             | VND-I2              | NDR1/HIN1-like 1                                                                  |
| T.hassleriana_19882                        | AT3G04720             |                     | pathogenesis-related 4                                                            |
| T.hassleriana_27070                        | AT2G15220             |                     | Plant basic secretory protein (BSP) family protein                                |
| T.hassleriana_05312                        | AT2G37170             |                     | plasma membrane intrinsic protein 2                                               |
| T.hassleriana_05313                        | AT2G37170             |                     | plasma membrane intrinsic protein 2                                               |
| T.hassleriana_12285                        | AT2G36830             | Aux/IAA             | gamma tonoplast intrinsic protein                                                 |
| T.hassleriana_12284                        | AT2G36830             |                     | gamma tonoplast intrinsic protein                                                 |
| T.hassleriana_14369                        | AT1G11670             | Aux/IAA             | MATE efflux family protein                                                        |
| T.hassleriana_08980                        | N.A.                  |                     |                                                                                   |
| T.hassleriana_07000                        | N.A.                  |                     |                                                                                   |

**Supplemental Table online 6.** List of clustered general leaf developmental and vasculature regulating genes along both leaf gradients.

| <b><i>T. hassleriana</i> cds ID<br/>(Cheng et al., 2013)</b> | <b>AGI</b> | <b>Annotation based on TAIR10</b>               | <b>Function in vascular development</b>                    |
|--------------------------------------------------------------|------------|-------------------------------------------------|------------------------------------------------------------|
| T.hassleriana_16883                                          | AT1G19850  | MONOPTEROS (MP)                                 | leaf initiation                                            |
| T.hassleriana_08823                                          | AT1G19850  | MONOPTEROS (MP)                                 | leaf initiation                                            |
| T.hassleriana_08424                                          | AT1G32240  | KANADI 2 (KAN2)                                 | leaf axis formation                                        |
| T.hassleriana_09176                                          | AT1G32240  | KANADI 2 (KAN2)                                 | leaf axis formation                                        |
| T.hassleriana_20498                                          | AT1G52150  | ATHB-15                                         | neg reg of vasc cell diff                                  |
| T.hassleriana_09793                                          | AT1G52150  | ATHB-15                                         | neg reg of vasc cell diff                                  |
| T.hassleriana_06450                                          | AT1G65620  | ASYMMETRIC LEAVES 2 (AS2)                       | leaf initiation                                            |
| T.hassleriana_19648                                          | AT1G73590  | PIN-FORMED 1 (PIN1)                             | vein initiation (polar auxin transport)                    |
| T.hassleriana_01843                                          | AT1G79430  | ALTERED PHLOEM DEVELOPMENT (APL)                | vascular cell identity repressed by REV                    |
| T.hassleriana_19440                                          | AT1G79430  | ALTERED PHLOEM DEVELOPMENT (APL)                | vascular cell identity repressed by REV                    |
| T.hassleriana_27016                                          | AT2G13820  | Bifunctional inhibitor/lipid-transfer protein   | vein formation (xylogen)                                   |
| T.hassleriana_27989                                          | AT2G27230  | LONESOME HIGHWAY (LHW)                          | transcription factor-related                               |
| T.hassleriana_09087                                          | AT2G27230  | LONESOME HIGHWAY (LHW)                          | transcription factor-related                               |
| T.hassleriana_15265                                          | AT2G27230  | LONESOME HIGHWAY (LHW)                          | transcription factor-related                               |
| T.hassleriana_15152                                          | AT2G28510  | Dof-type zinc finger DNA-binding family protein | Dof-type zinc finger DNA-binding family protein            |
| T.hassleriana_27908                                          | AT2G28510  | Dof-type zinc finger DNA-binding family protein | Dof-type zinc finger DNA-binding family protein            |
| T.hassleriana_06822                                          | AT2G33860  | ETTIN (ETT)                                     | leaf axis formation abaxial fate                           |
| T.hassleriana_23279                                          | AT2G33860  | ETTIN (ETT)                                     | leaf axis formation abaxial fate                           |
| T.hassleriana_23086                                          | AT2G37630  | ASYMMETRIC LEAVES 1 (AS1)                       | leaf initiation                                            |
| T.hassleriana_18733                                          | AT4G08150  | KNOTTED-like from Arabidopsis thaliana (KNAT1)  | leaf initiation                                            |
| T.hassleriana_09854                                          | AT4G08150  | KNOTTED-like from Arabidopsis thaliana (KNAT1)  | leaf initiation                                            |
| T.hassleriana_25576                                          | AT4G24060  | Dof-type zinc finger DNA-binding family protein | Dof-type zinc finger DNA-binding family protein            |
| T.hassleriana_22410                                          | AT4G32880  | homeobox gene 8 (HB-8)                          | vein initiation (post auxin marker of vascular patterning) |
| T.hassleriana_28697                                          | AT5G16560  | KANADI (KAN)                                    | leaf axis formation abaxial; neg reg of PIN1               |
| T.hassleriana_19776                                          | AT5G16560  | KANADI (KAN)                                    | leaf axis formation abaxial; neg reg of PIN1               |
| T.hassleriana_18288                                          | AT5G60200  | TARGET OF MONOPTEROS 6 (TMO6)                   | TARGET OF MONOPTEROS 6                                     |
| T.hassleriana_16642                                          | AT5G60200  | TARGET OF MONOPTEROS 6 (TMO6)                   | TARGET OF MONOPTEROS 6                                     |
| T.hassleriana_18265                                          | AT5G60690  | REVOLUTA (REV)                                  | adaxial leaf axis formation                                |
| T.hassleriana_19132                                          | AT5G60690  | REVOLUTA (REV)                                  | adaxial leaf axis formation                                |
| T.hassleriana_17767                                          | AT5G64080  | XYP1                                            | vein formation (xylogen)                                   |
| T.hassleriana_26861                                          | AT5G64080  | XYP1                                            | vein formation (xylogen)                                   |

## Supplemental Methods

### Leaf clearings and safranine staining (Supplemental Figure 1)

For leaf clearings *T. hassleriana* and *G. gynandra* leaves of stage 0 to 5 were destained in 70% EtOH with 1% glycerol added for 24 hrs and cleared in 5% NaOH until they appeared translucent and rinsed with H<sub>2</sub>O<sub>dest</sub>. Leaves were imaged under dark field settings with stereo microscope SMZ1500 (Nikon, Japan). Prior safranine staining, leaves were destained with increasing EtOH series until 100% EtOH and stained for 5 -10 min with 1% safranine (1g per 100ml 96% EtOH). After destaining leaves were analyzed with bright field microscope (Zeiss, Germany). Vein orders were determined by width and position as described by (McKown and Dengler, 2009) for *Flaveria* species.

### Contig assembly and annotation (Supplemental Figure 4, Table 1 and Dataset 3)

Cleaned and filtered paired end (PE) reads were used to create a reference transcriptome for each species. The initial *de novo* assembly was optimized by using 31-kmer using Velvet (v1.2.07) and Oases (v0.2.08) pipeline (Zerbino and Birney, 2008; Schulz et al., 2012). For quality purposes the longest assembled transcript was selected with custom made perl scripts if multiple contigs were present (Schliesky et al., 2012) resulting in 59,471 *G. gynandra* and 52,479 *T. hassleriana* contigs. For quality assessment PE reads were aligned again to the respective contigs for each species via TopHat standard settings with over 60% backmapping efficiency in both species. Assembled longest transcripts were annotated using BLASTX mapping against TAIR10 proteome database (cut-off  $1e^{-10}$ ). The best blastx hits were filtered by the highest bitscore. For quality assessment of contigs, *T. hassleriana* contigs were aligned with BLASTN against *T. hassleriana* predicted cds (Cheng et al., 2013). Multiple matching contigs to one cds identifier were filtered with customized perl script.

### Cross species mapping sensitivity assessment (Supplemental Figure 5; Table 2)

All three biological replicates of leaf stage 5, stamen and young seed from *T. hassleriana* were mapped with BLAT V35 in dnax mode (nucleotide sequence of query and reference are translated in six frames to protein) with default parameters to both, the *T. hassleriana* gene models and the *A. thaliana* TAIR10 representative gene models. Subsequently, the BLAT output was filtered for the best match per read based on the highest score. RPKMs were calculated based on mappable reads per million (RPKM). The RPKM expression data was collapsed to single *A. thaliana* AGIs (RPKM were added) to avoid multiple assigned *T. hassleriana*'s IDs to the same AGI. Pearson's correlation *r* was calculated between the mapped *T. hassleriana* replicates mapped on *A. thaliana* gene models among each other. Also Pearson's correlation *r* was calculated between cross species mapped *T. hassleriana* leaf5, stamen and seed1 replicates and the replicates of Leaf5 mapped to its own cds in *T. hassleriana*.

### Principal component analysis (Supplemental Figure 8)

Principal component analyses (PCA, Yeung and Ruzzo, 2001) was carried out with MULTI EXPERIMENT VIEWER VERSION 4 (MEV4, (Saeed et al., 2003; Saeed et al.,

2006) on gene row SD normalized averaged RPKMs with median centering.

### **Enzyme Assays (Supplemental Figure 15)**

From *G. gynandra* leaf stage 2 to 5, enzymatic activities of known C<sub>4</sub> enzymes were determined as summarized by Ashton et al. (1990) in three biological replicates.

### **Comparison of Cleomaceae leaf gradients to *A. thaliana* leaf differentiation (Supplemental Figure 19)**

Examination of Cleomaceae expression patterns of genes differentially regulated during the transition from cell proliferation to expansion in *A. thaliana*.

Andriankaja et al. (2012) observed that the transition between cell proliferation and expansion occurred between days 9 and 10. They defined two sets of genes significantly differentially expressed between day 9 and 10, one up-regulated and one down-regulated. The expression of the *T. hassleriana* and *G. gynandra* homologues of these genes were analyzed. The sum of standard error (SSE) was taken as a quality control to determine an appropriate number of clusters. The number of cluster centers chosen was 7 and 5 for up-regulated and down-regulated genes, respectively. The *K*-means clustering was performed the same as before, except that genes were not previously filtered by expression level and genes were only binned once into clusters.

### **Supplemental References**

**Andriankaja, M., Dhondt, S., De Bodt, S., Vanhaeren, H., Coppens, F., De Milde, L., Muehlenbock, P., Skirycz, A., Gonzalez, N., Beemster, G.T.S., and Inze, D. (2012).** Exit from Proliferation during Leaf Development in *Arabidopsis thaliana*: A Not-So-Gradual Process. *Dev. Cell* 22, 64-78.

**Ashton A.R., Burnell J.N., Furbank R.T., Jenkins C.L.D., Hatch M.D. (1990).** The enzymes in C<sub>4</sub> photosynthesis. In *Enzymes of Primary Metabolism. Methods in Plant Biochemistry*, P.M. Dey and J.B. Harborne, eds (London: Academic Press), pp. 39–72

**Cheng, S., van den Bergh, E., Zeng, P., Zhong, X., Xu, J., Liu, X., Hofberger, J., de Bruijn, S., Bhide, A.S., Kuelahoglu, C., Bian, C., Chen, J., Fan, G., Kaufmann, K., Hall, J.C., Becker, A., Braeutigam, A., Weber, A.P.M., Shi, C., Zheng, Z., Li, W., Lv, M., Tao, Y., Wang, J., Zou, H., Quan, Z., Hibberd, J.M., Zhang, G., Zhu, X.-G., Xu, X., and Schranz, M.E. (2013).** The *Tarenaya hassleriana* Genome Provides Insight into Reproductive Trait and Genome Evolution of Crucifers. *Plant Cell* 25, 2813-2830.

**McKown, A.D., and Dengler, N.G. (2009).** Shifts in leaf vein density through accelerated vein formation in C-4 *Flaveria* (Asteraceae). *Annals of Botany* 104, 1085-



1098.

**Saeed, A.I., Hagabati, N.K., Braisted, J.C., Liang, W., Sharov, V., Howe, E.A., Li, J., Thiagarajan, M., White, J.A., and Quackenbush, J.** (2006). TM4 microarray software suite. In DNA Microarrays, Part B: Databases and Statistics, A. Kimmel and B. Oluver, eds, pp. 134.

**Saeed, A.I., Sharov, V., White, J., Li, J., Liang, W., Bhagabati, N., Braisted, J., Klapa, M., Currier, T., Thiagarajan, M., Sturn, A., Snuffin, M., Rezantsev, A., Popov, D., Ryltsov, A., Kostukovich, E., Borisovsky, I., Liu, Z., Vinsavich, A., Trush, V., and Quackenbush, J.** (2003). TM4: A free, open-source system for microarray data management and analysis. *Biotechniques* **34**, 374.

**Schliesky, S., Gowik, U., Weber, A.P.M., and Brautigam, A.** (2012). RNA-Seq Assembly - Are We There Yet? *Front Plant Sci* **3**, 220-220.

**Schulz, M.H., Zerbino, D.R., Vingron, M., and Birney, E.** (2012). Oases: robust de novo RNA- seq assembly across the dynamic range of expression levels. *Bioinformatics* **28**, 1086- 1092.
